# Supplementary material for: An Extensive Quality Control and Quality Assurance (QC/QA) Program Significantly Improves Inter-Laboratory Concordance Rates of Flow-Cytometric Minimal Residual Disease Assessment in Acute Lymphoblastic Leukemia: An I-BFM-FLOW-Network Report
Source: MDPI journal article supplement (doi:10.3390/cancers13236148), 2021-12-06
Supplement: s1 [file s1]

## **iBFM FLOW *twinning* program**

|                                                         |                                       |
|---------------------------------------------------------|---------------------------------------|
| <b>ALL IC-BFM center:</b>                               | <b>xxxx</b>                           |
| <b>AIEOP-BFM partner:</b>                               | <b>AUSTRIA Vienna</b>                 |
| <b>Start of co-operation:</b>                           | <b>2002; renewed 15/10/2010</b>       |
| <b>Training periods:</b>                                | <b>01/07/2002-31/07/2002</b>          |
| <b>Ring trials:</b>                                     | <b>Successfully passed 2016/17/18</b> |
| <b>Advanced maturation criteria fulfilled for B-ALL</b> | <b>YES      Date: 23.05.2018</b>      |

\* to be filled by AIEOP-BFM partner

**“Maturation” granted for B-lineage ALL  
at regenerative time-points  
(day 78; after HR- and relapse cycles)**

**AIEOP-BFM supervisor\*:      Angela Schumich/Michael N. Dworzak      date: 23.05.2018**

**iBFM FLOW network coordinator:      Michael N. Dworzak      date: 23.05.2018**
