# Supplementary material for: An Extensive Quality Control and Quality Assurance (QC/QA) Program Significantly Improves Inter-Laboratory Concordance Rates of Flow-Cytometric Minimal Residual Disease Assessment in Acute Lymphoblastic Leukemia: An I-BFM-FLOW-Network Report
Source: MDPI journal article supplement (doi:10.3390/cancers13236148), 2021-12-06
Supplement: s1 [file s1]

# LMD MRD trials (2016-2020)

## BCP-Regeneration

| symbol                                                                            | faults | rating   |
|-----------------------------------------------------------------------------------|--------|----------|
|    | ≤ 10 % | success  |
|   | ≤ 25 % | warning  |
|  | > 25 % | critical |

### AIEOP-BFM contributing labs

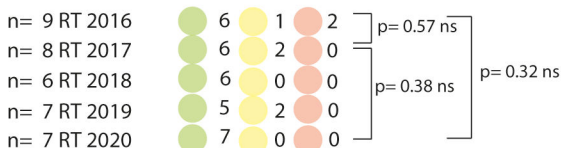

### ALL IC-BFM contributing labs

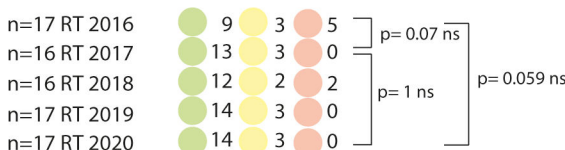

### Total contributing I-BFM labs

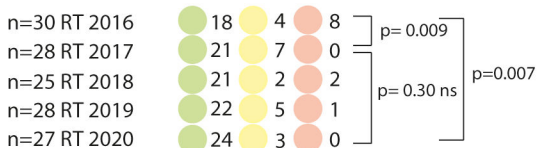

2x3 Contingency Table Exact test, two-tailed, Freeman-Halton extension to Fisher's exact test

| LMD Trial | Group      | No. of participants | Passed successfully | (%) |
|-----------|------------|---------------------|---------------------|-----|
| RT 2016   | ALL IC-BFM | 17                  | 9                   | 53  |
| RT 2017   | ALL IC-BFM | 16                  | 13                  | 81  |
| RT 2018   | ALL IC-BFM | 16                  | 12                  | 75  |
| RT 2019   | ALL IC-BFM | 17                  | 14                  | 82  |
| RT 2020   | ALL IC-BFM | 17                  | 14                  | 82  |
