# Supplementary material for: An Extensive Quality Control and Quality Assurance (QC/QA) Program Significantly Improves Inter-Laboratory Concordance Rates of Flow-Cytometric Minimal Residual Disease Assessment in Acute Lymphoblastic Leukemia: An I-BFM-FLOW-Network Report
Source: MDPI journal article supplement (doi:10.3390/cancers13236148), 2021-12-06
Supplement: s1 [file s1]

# **Ring trials – LMD file send-arounds**

Analysis of problematic cases

Educational Slides

# BCP - REGENERATION LMD MRD trial 2020 (RT9)

## Analysis of problematic cases

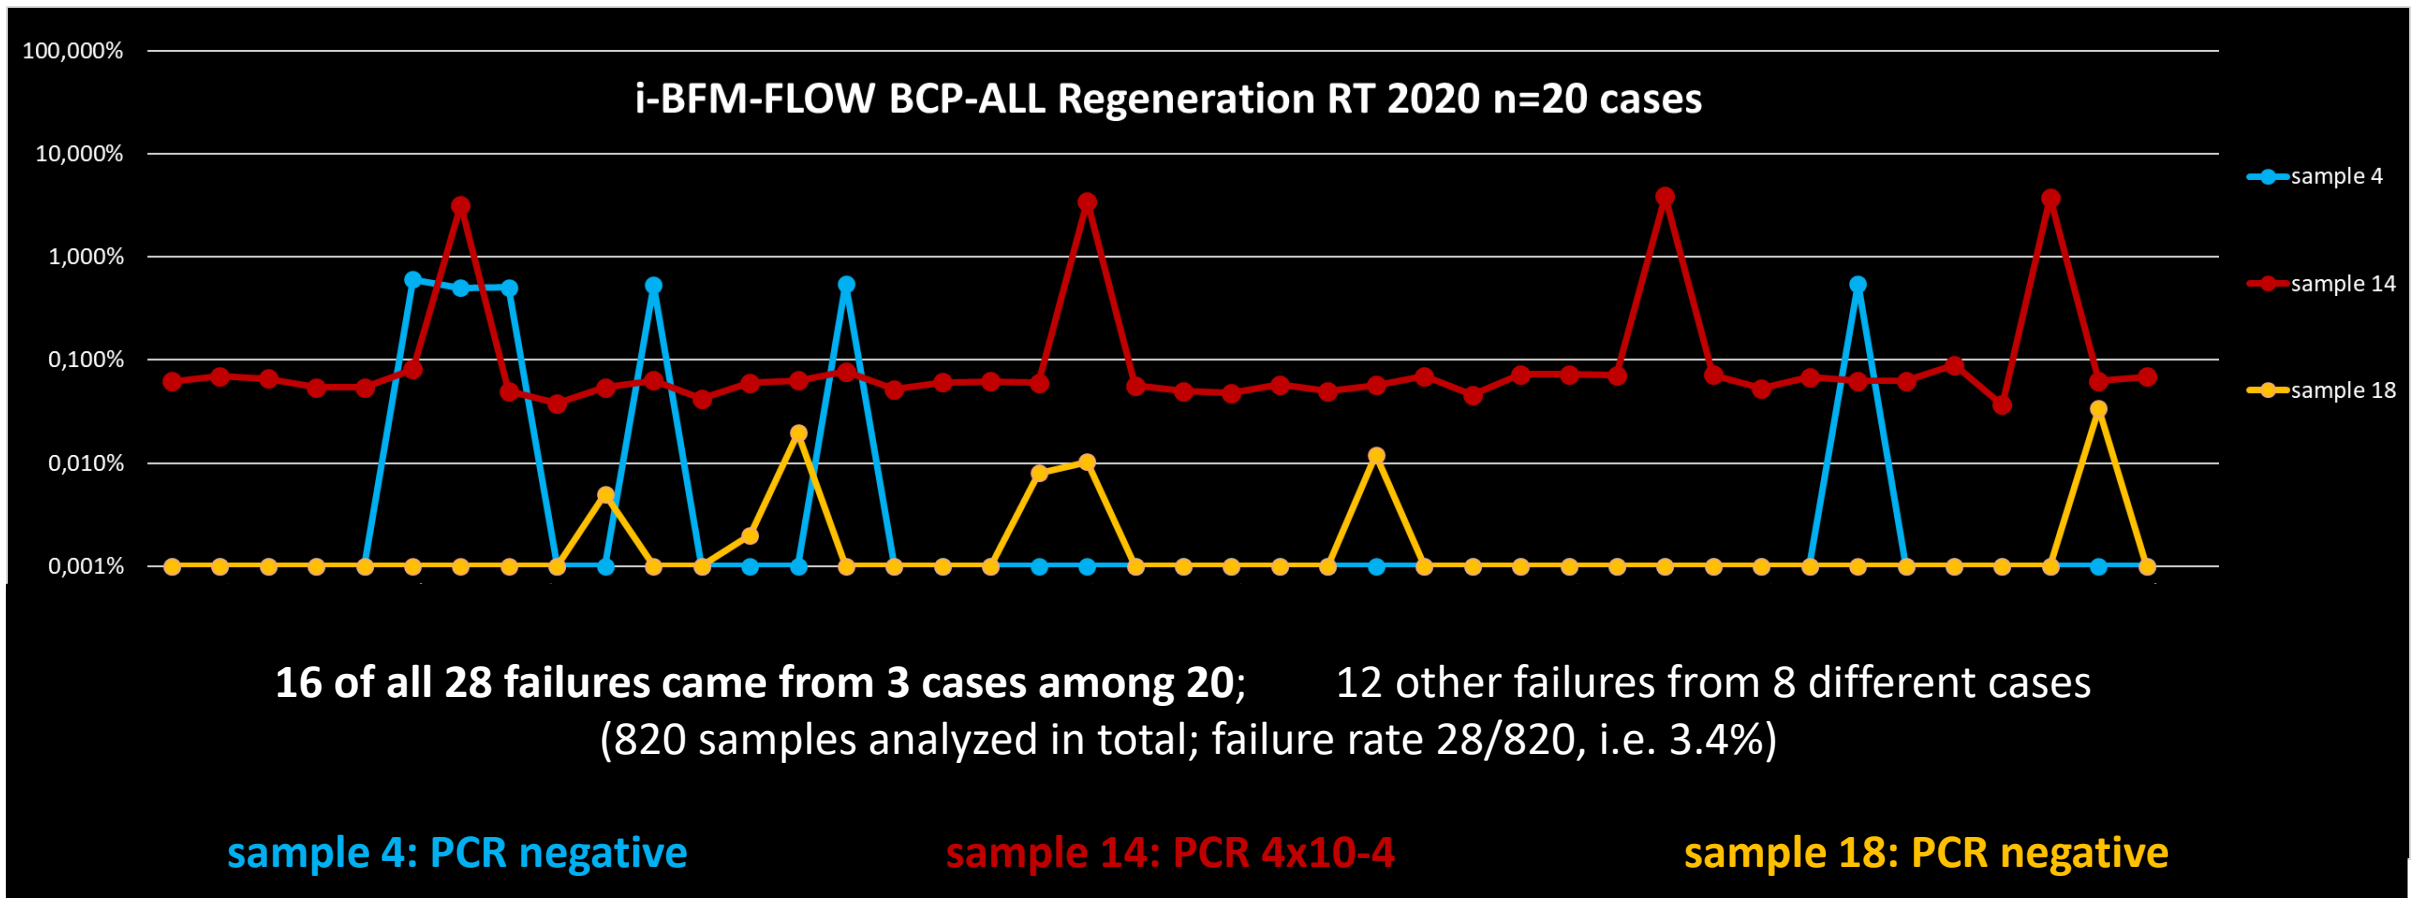

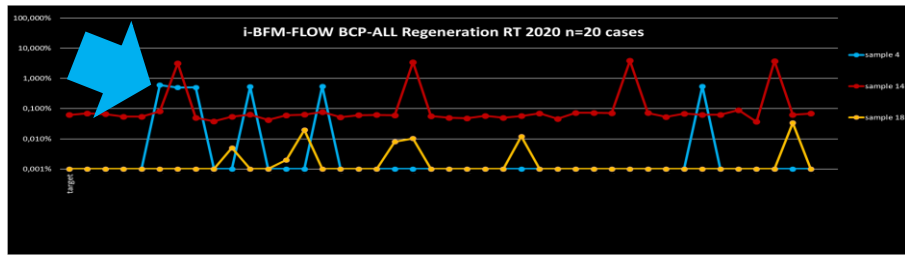

Case 4

RQ-PCR neg

Target vote: **negative**

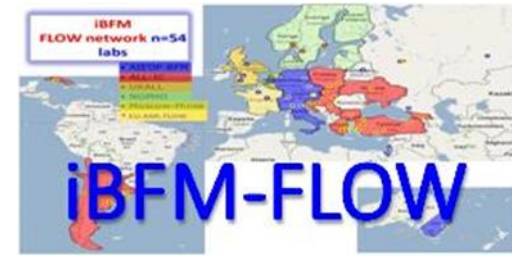

**Problem:**

**Strong early BCP 1 & 2-regeneration; few mature BCP3**

**CD34 dim/negative**

**Solution:**

**mind very compact patterns**  
**e.g. in CD38, CD45, FSC**

**No aberration in any marker (except CD34)**

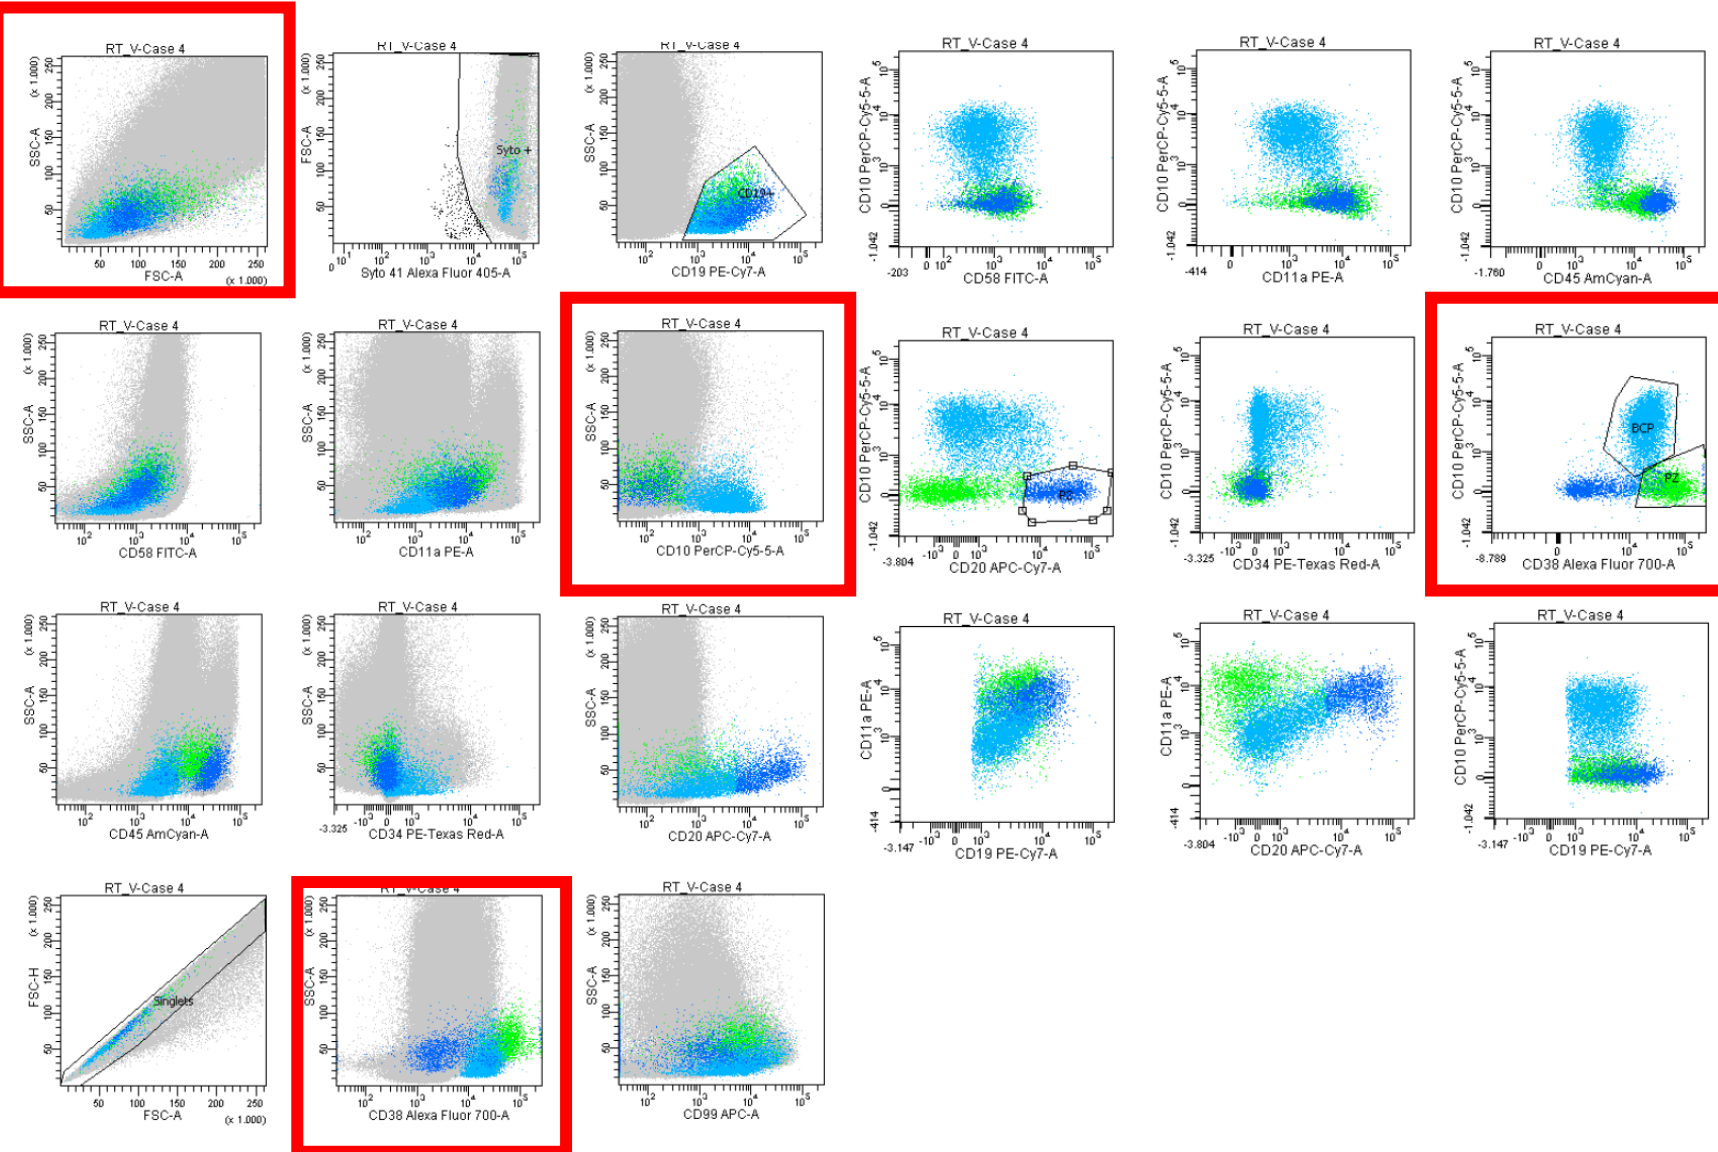

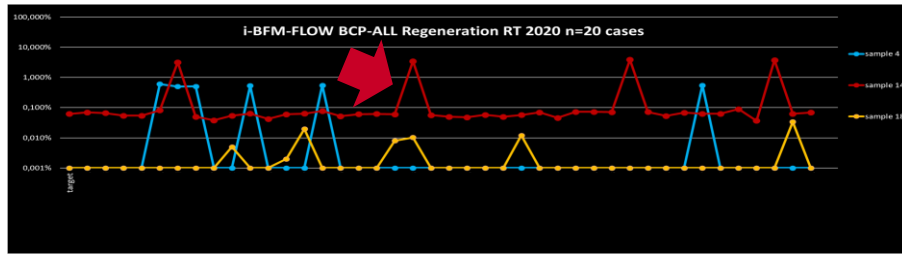

# Case 14

RQ-PCR  $4 \times 10^{-4}$

Target vote: **positive 0.062%**

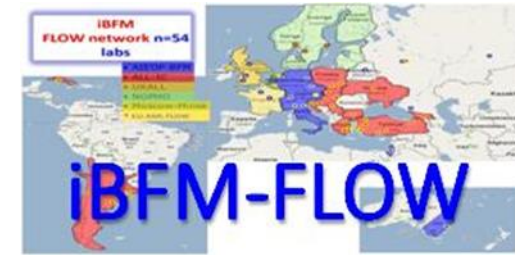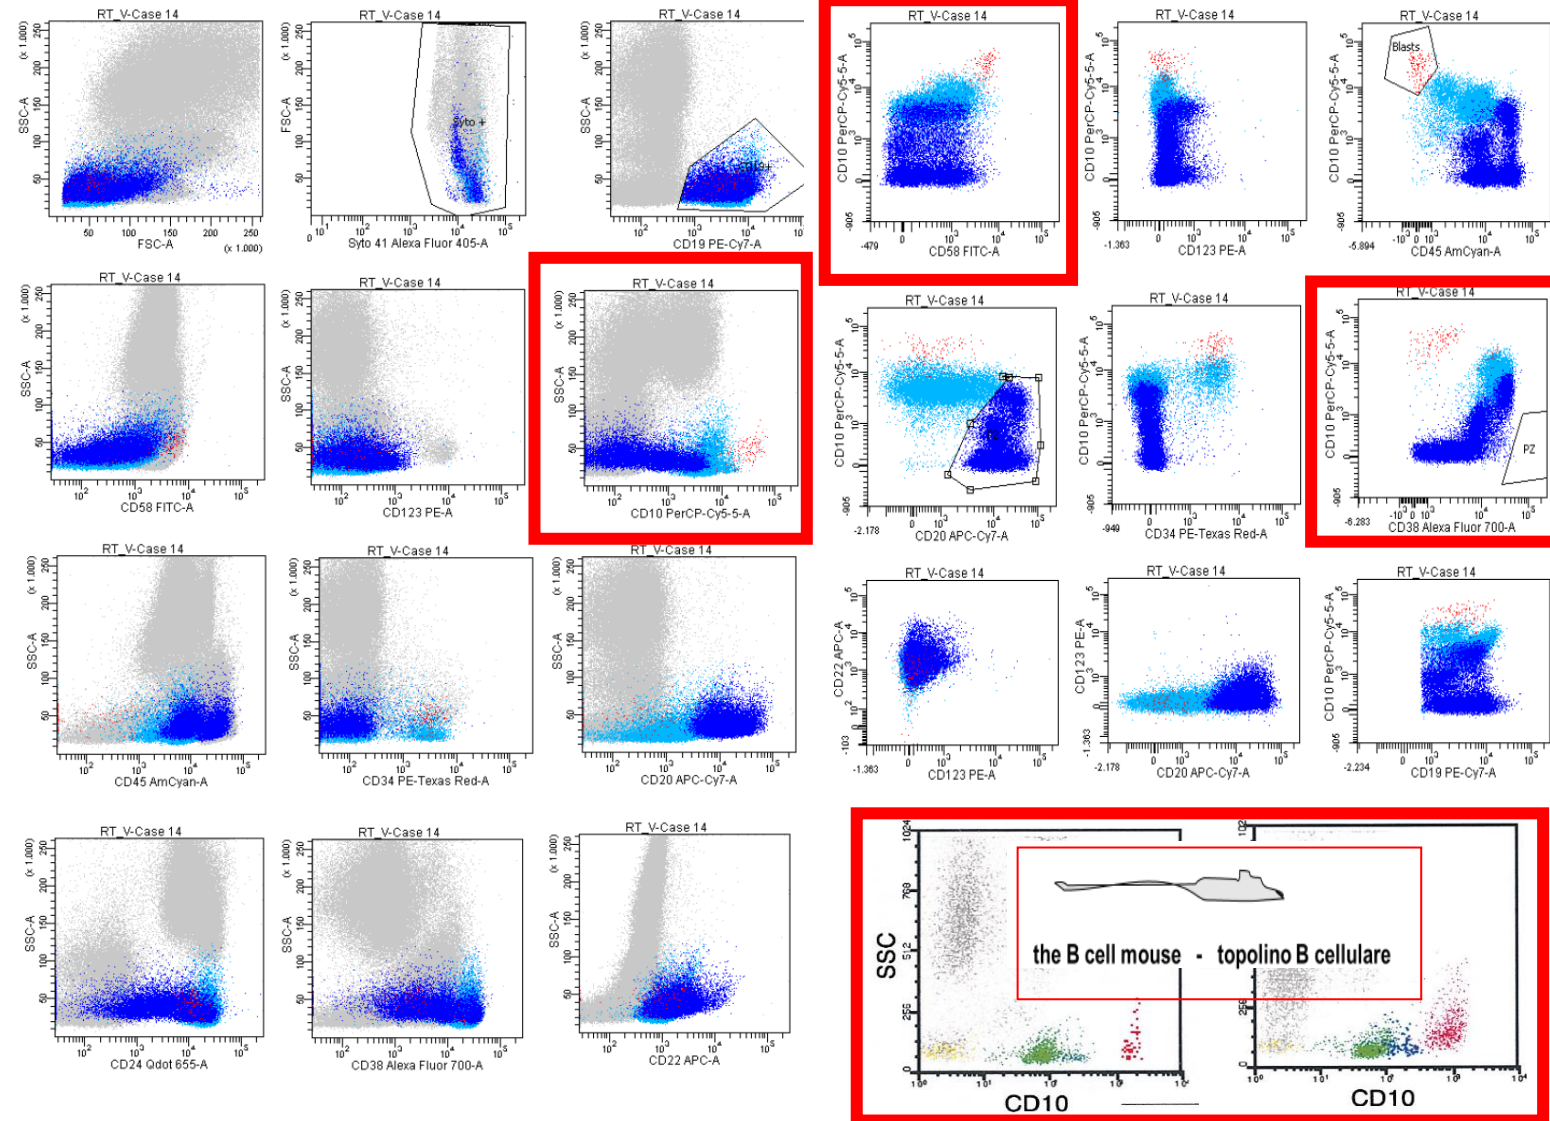

**Problem:**

*Heavy regeneration*

*Coexistence of **blasts** & BCP*  
*Mature BCP „echo“ population*

**Solutions: MANY**

**CD10 overexpression**

**SSC elevated**

**CD19 higher than BCP 1&2**

**CD38 & CD45 too low**

**CD58 overexpression**

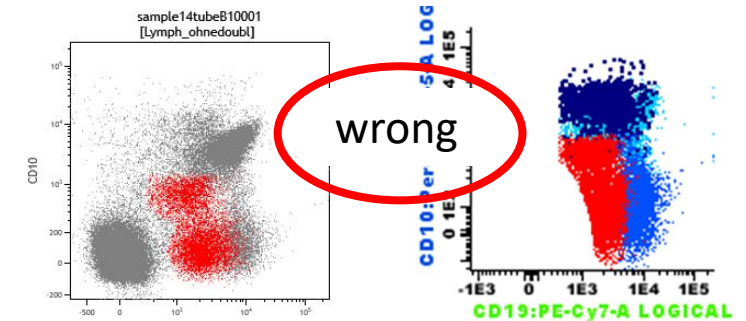



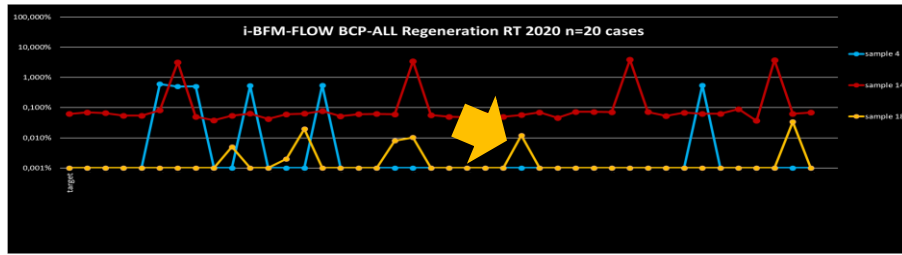

Case 18

RQ-PCR neg

Target vote: **negative**

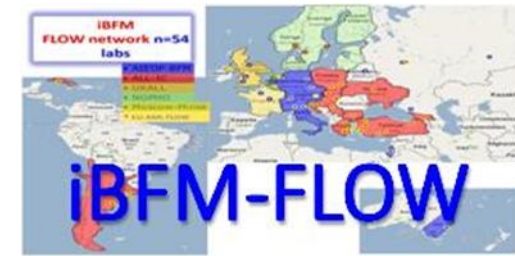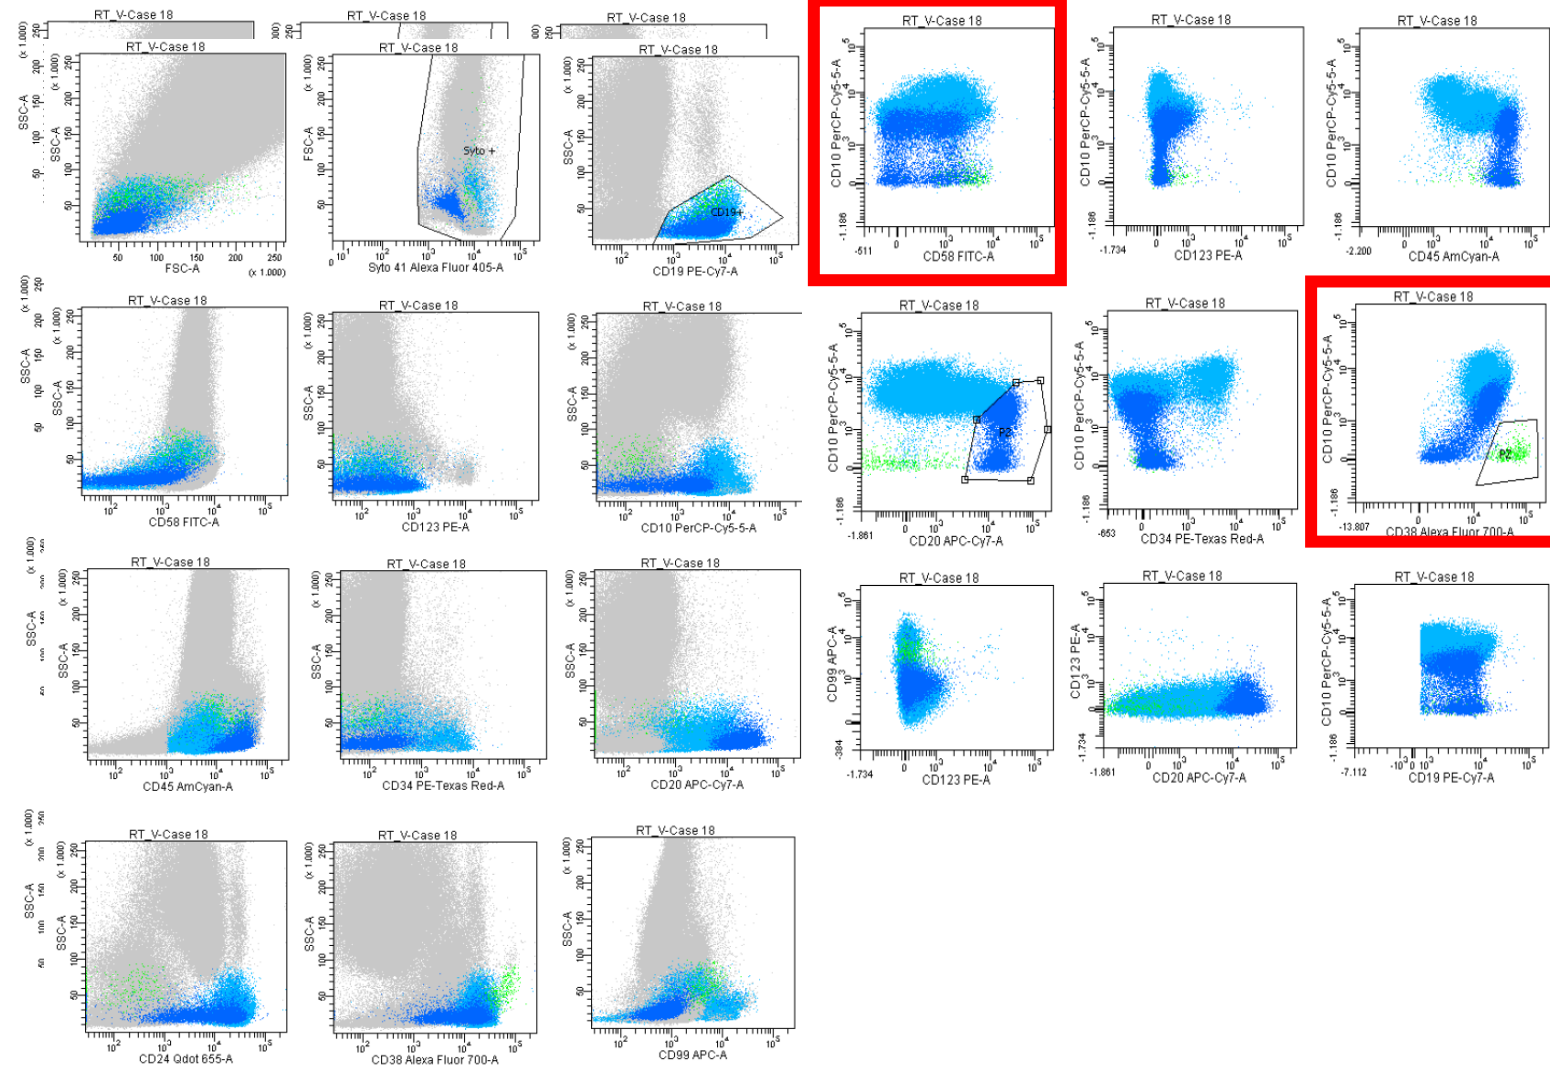

**Problem:**

**Strong early BCP 1 & 2-regeneration**

**Solution:**

**mind very compact patterns**  
**e.g. in CD38, CD45**

**No aberration in any marker**

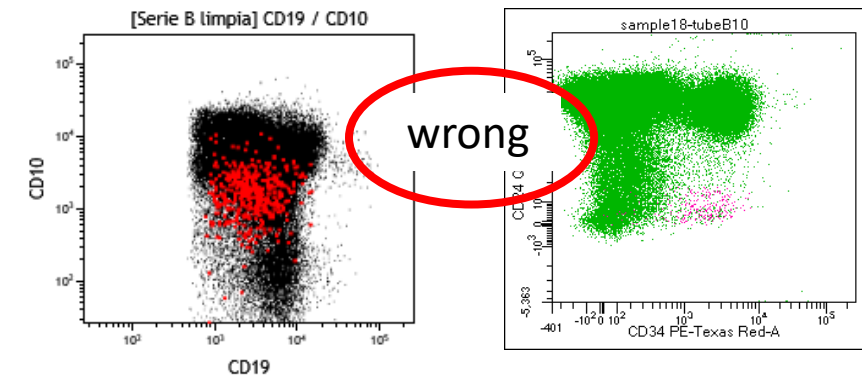

# BCP - REGENERATION LMD MRD trial 2017 (RT6)

## Analysis of problematic cases

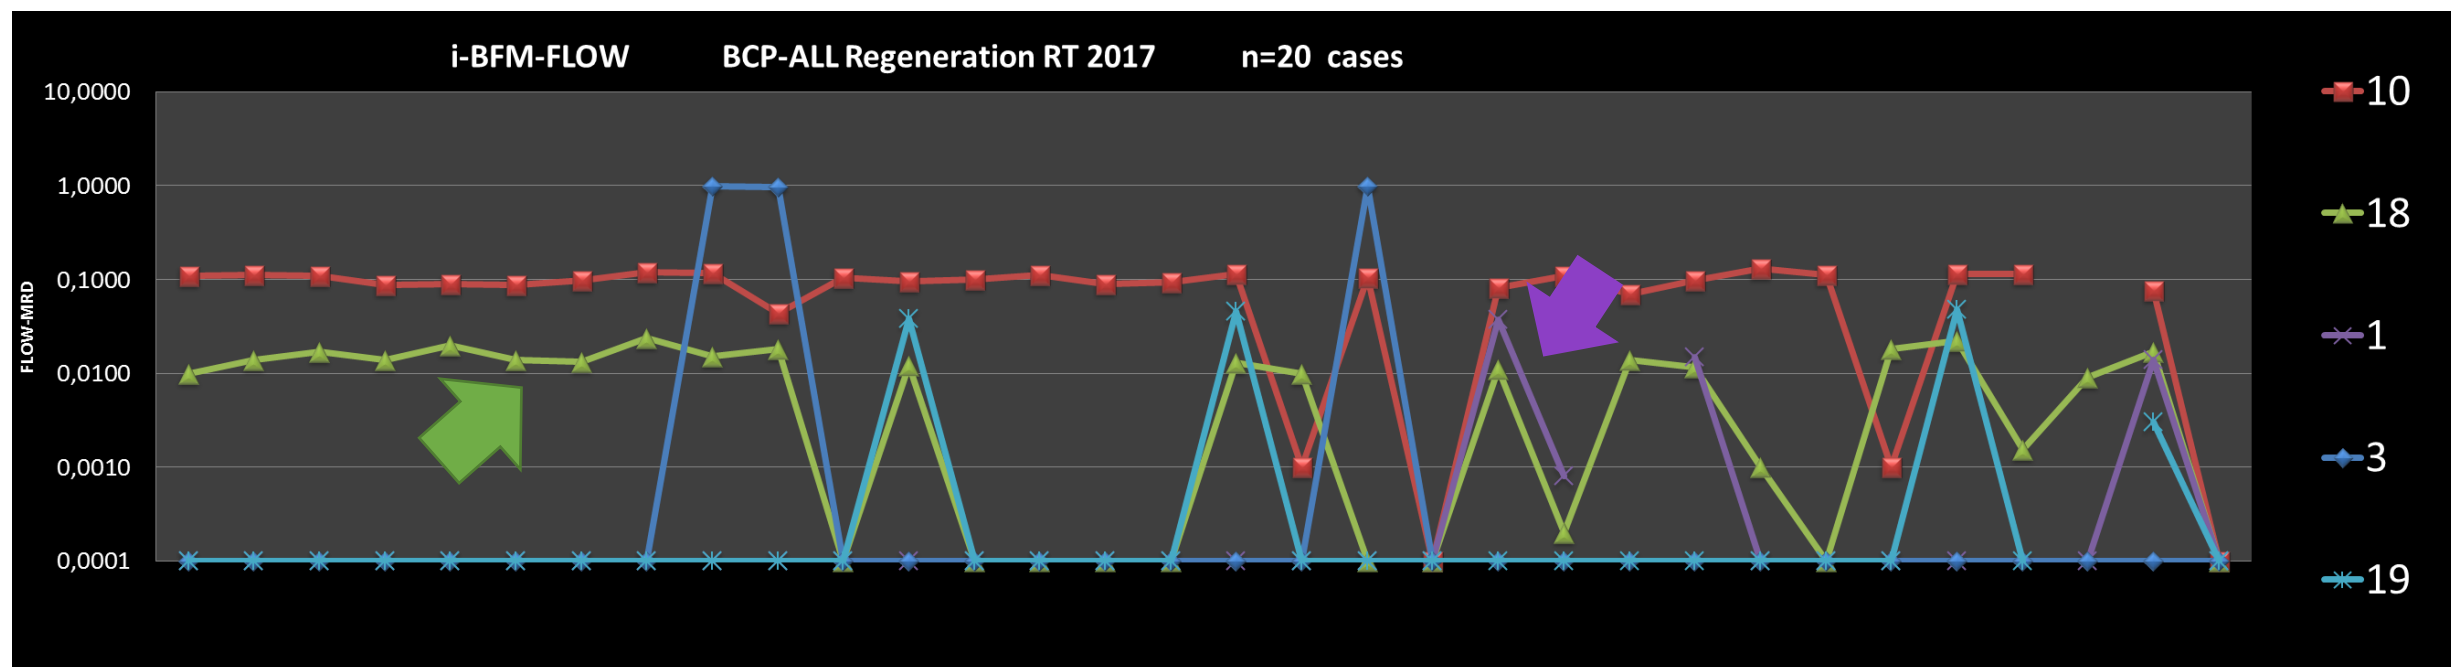

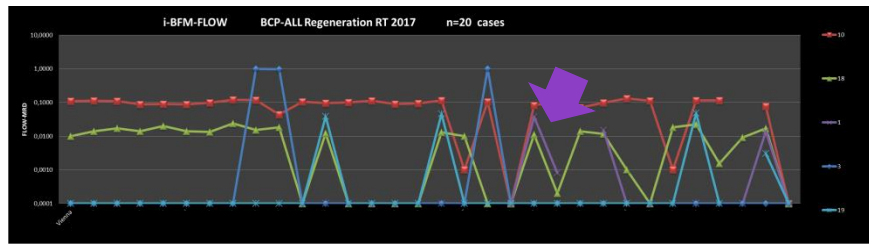

# Case 1

Target vote: **negative**

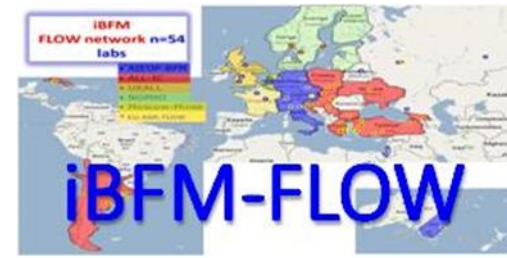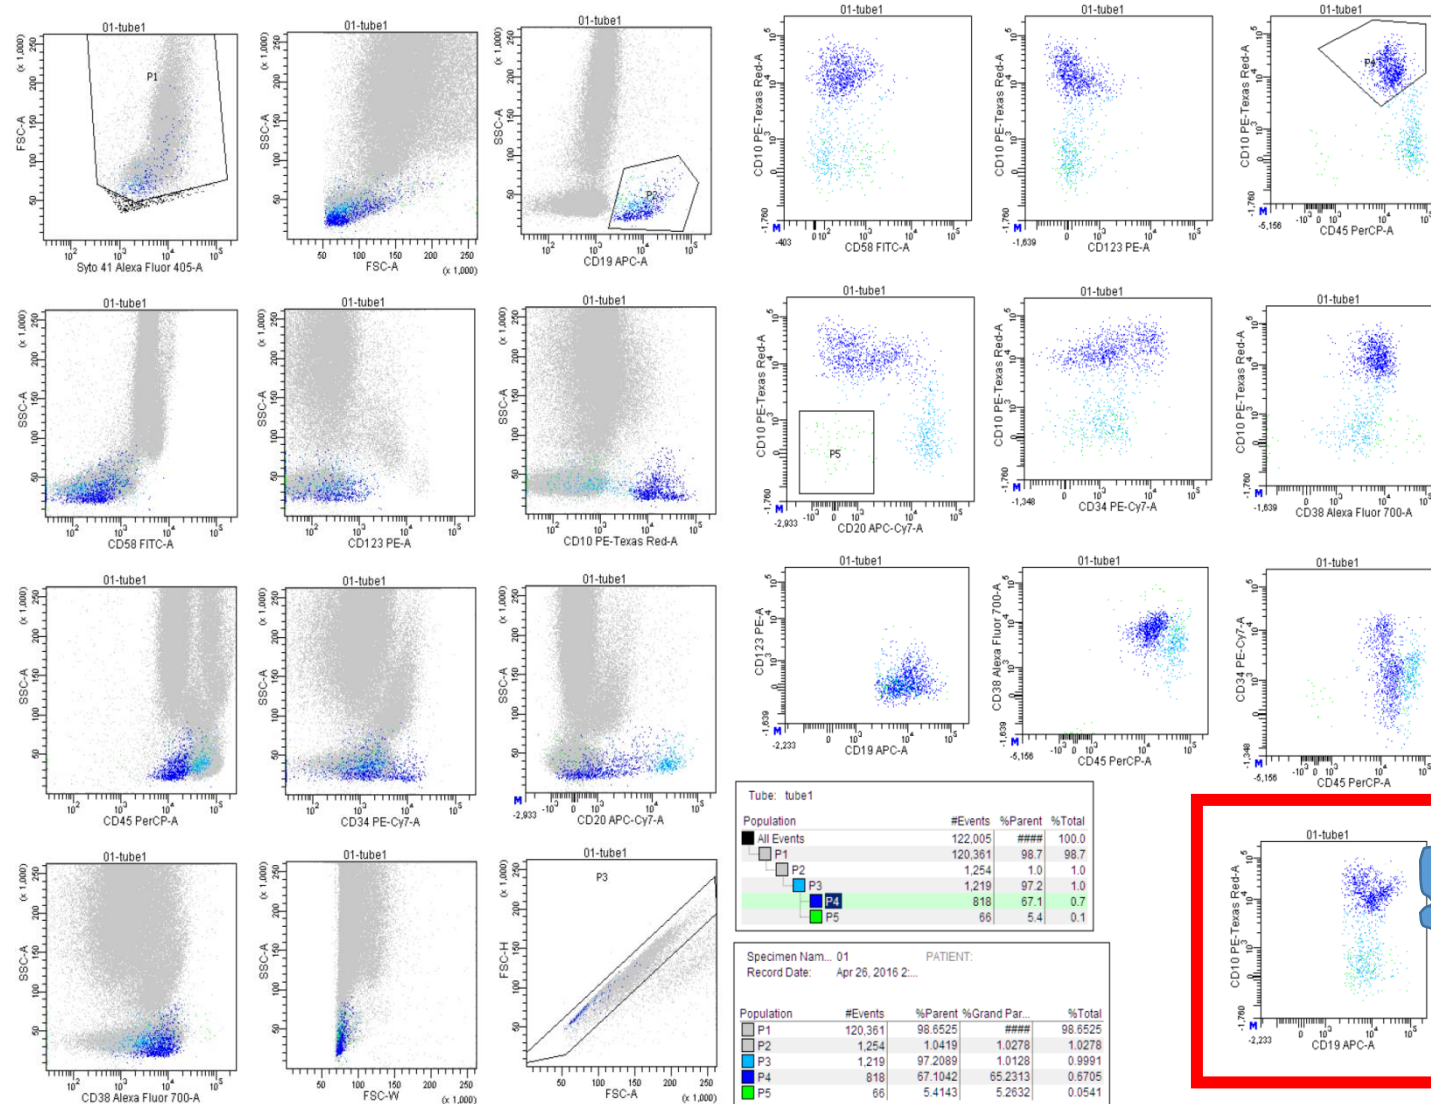

**Problem:**

**early & intermediate BCP-regeneration**

**Mind „the funny ghost-view“ in the CD19 vs. CD10 plot**

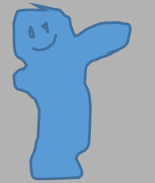

*I'm normal*

**Solution:**

**mind cluster gating – do not construct populations (by Boolean connections)**

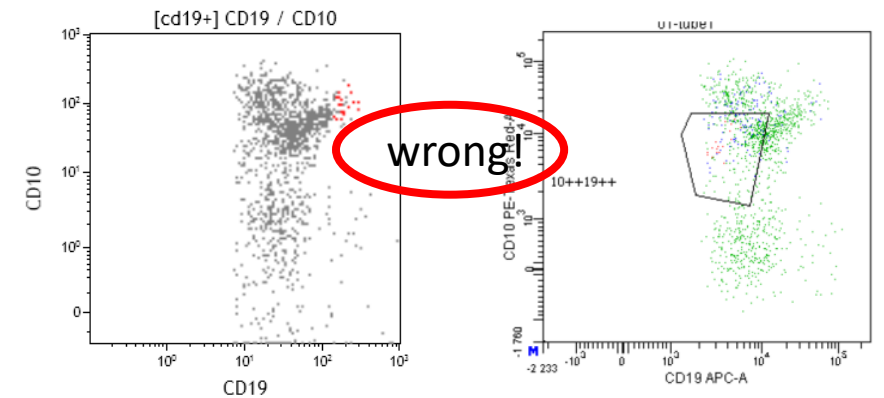



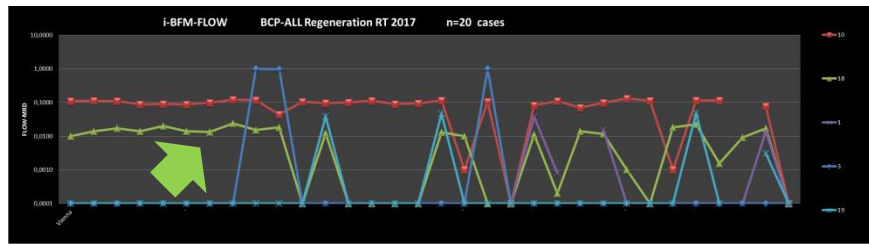

# Case 18

Target vote: **positive ~0.01%**

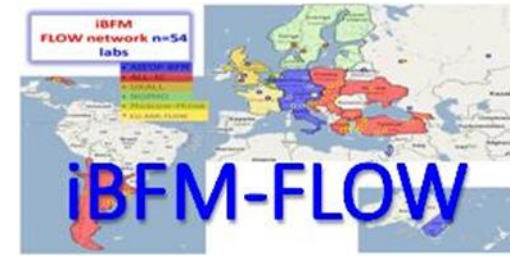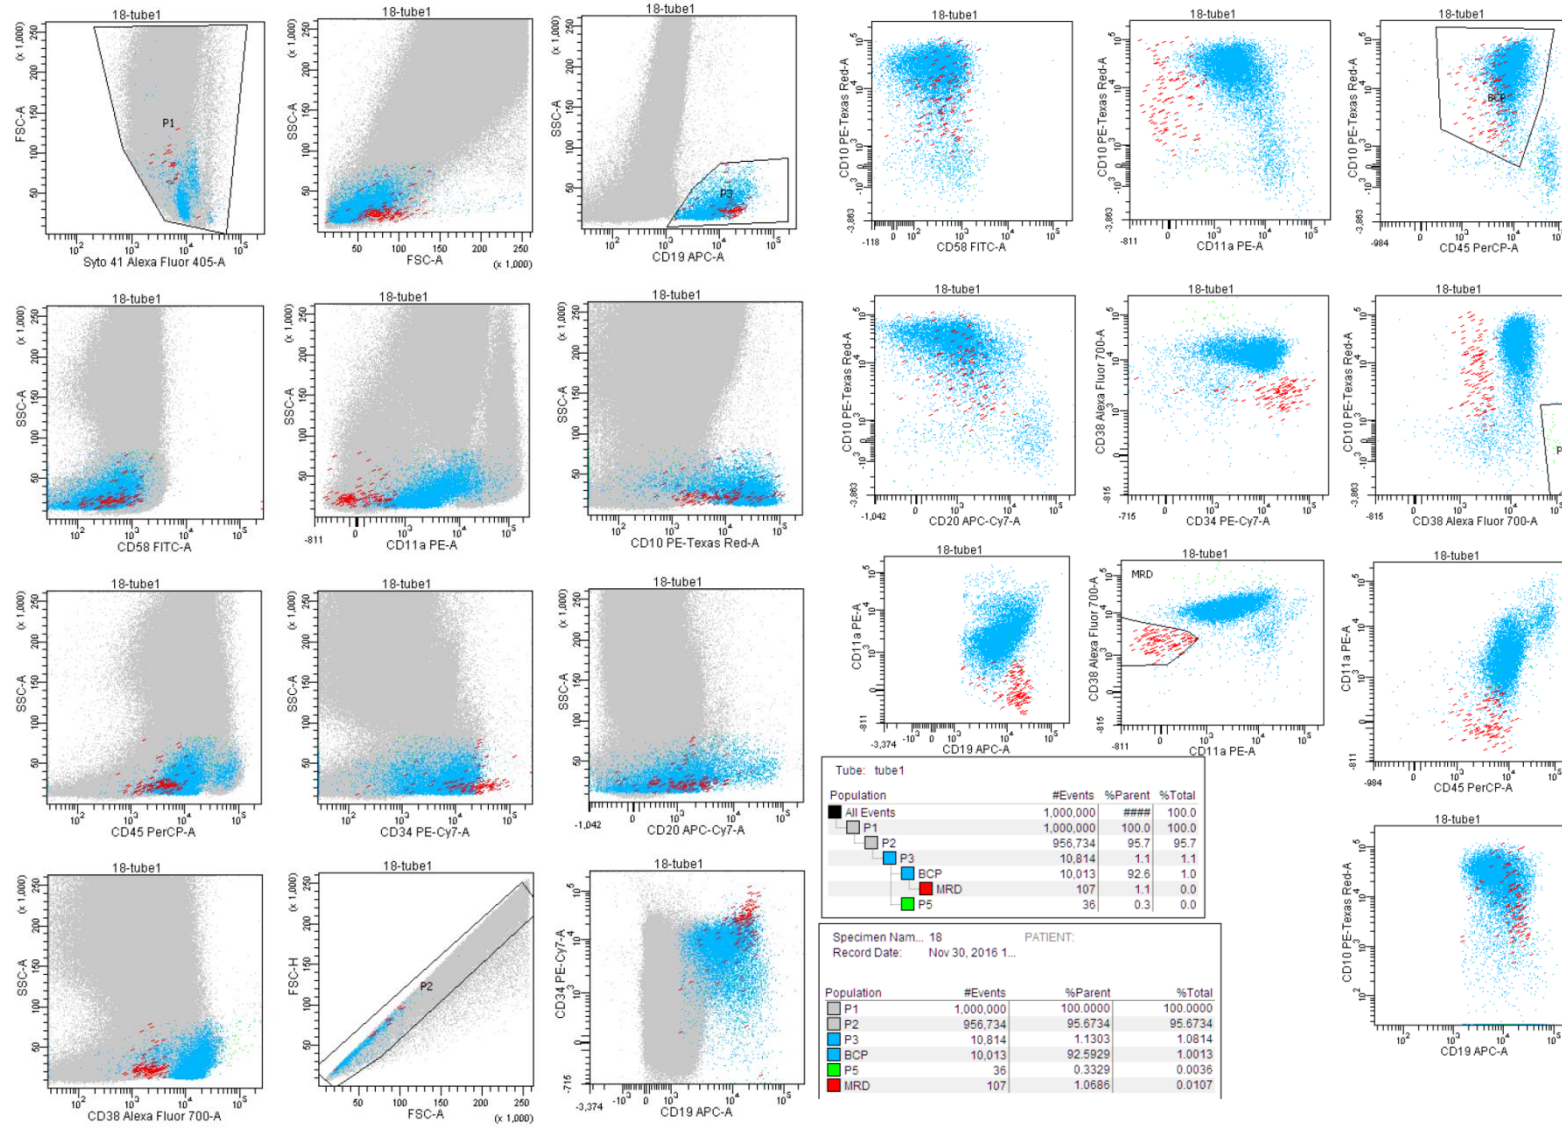

**Problem:**

*strong EARLY BCP-regeneration*

*insufficient separation by classical markers like CD10*

**Solution:**

*mind CD11a (!), CD38*



# BCP - REGENERATION LMD MRD trial 2019 (RT8)

## Analysis of problematic cases

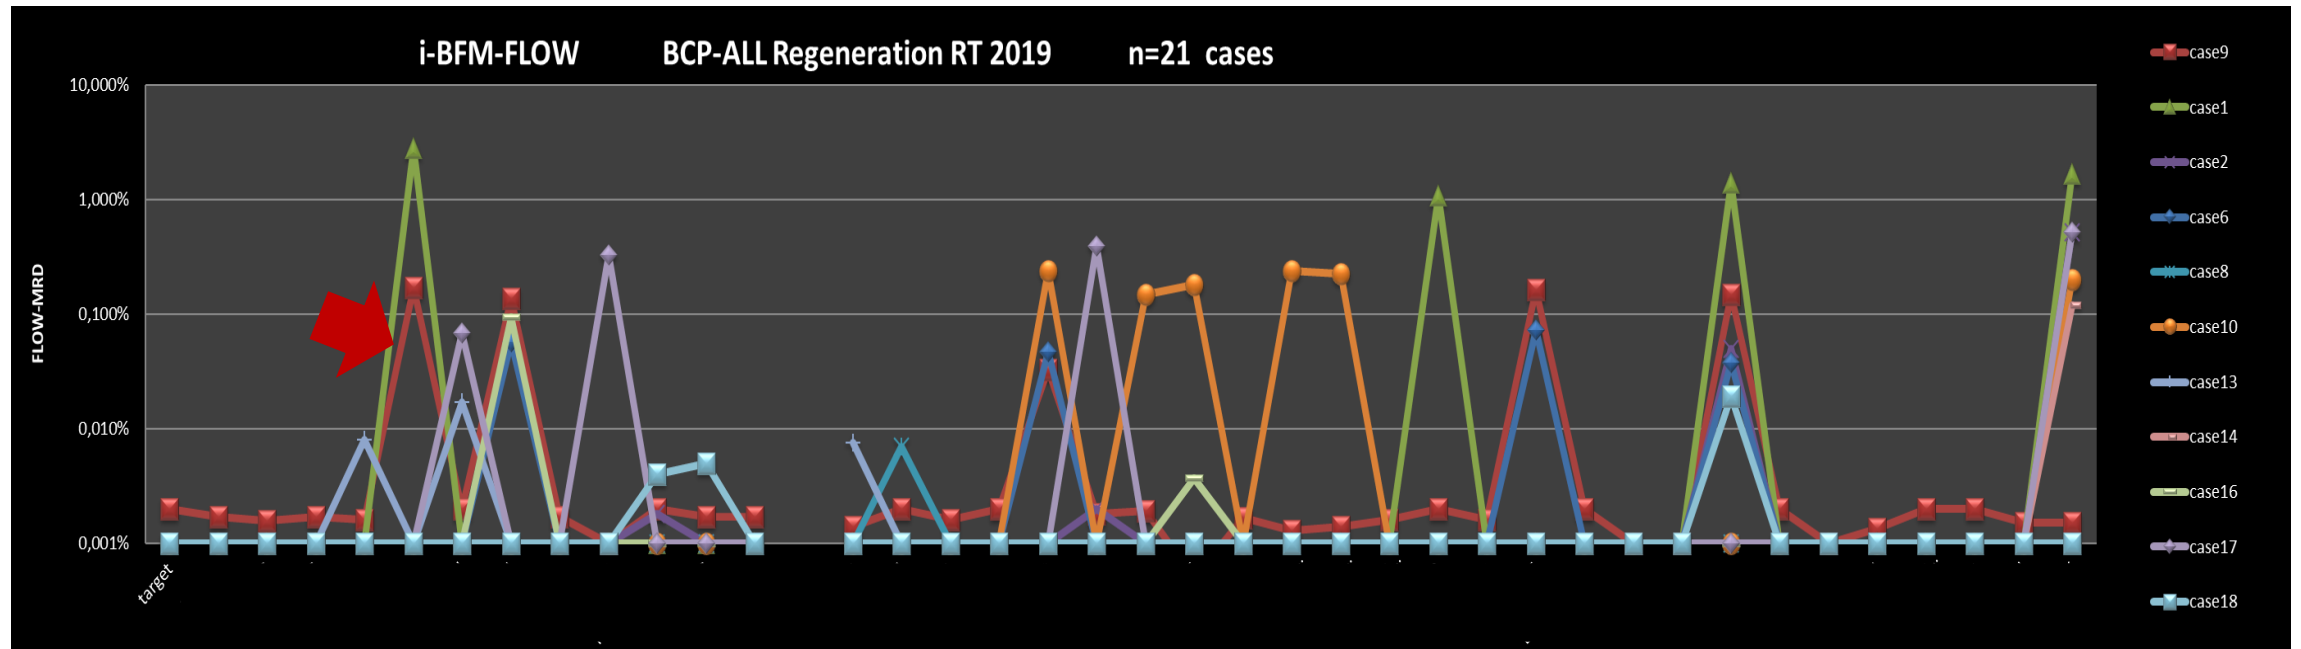

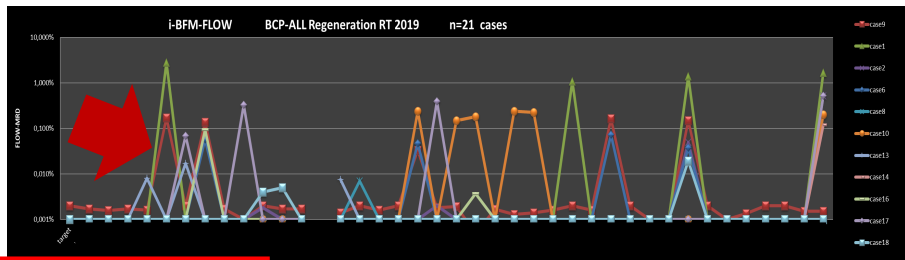

## Case 9

Target vote: **positive ~0.002%**

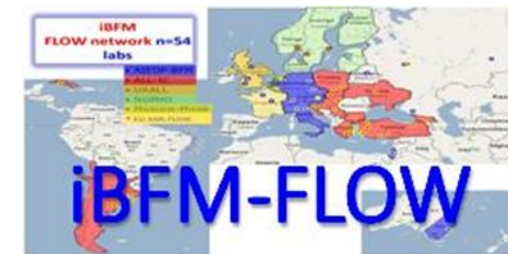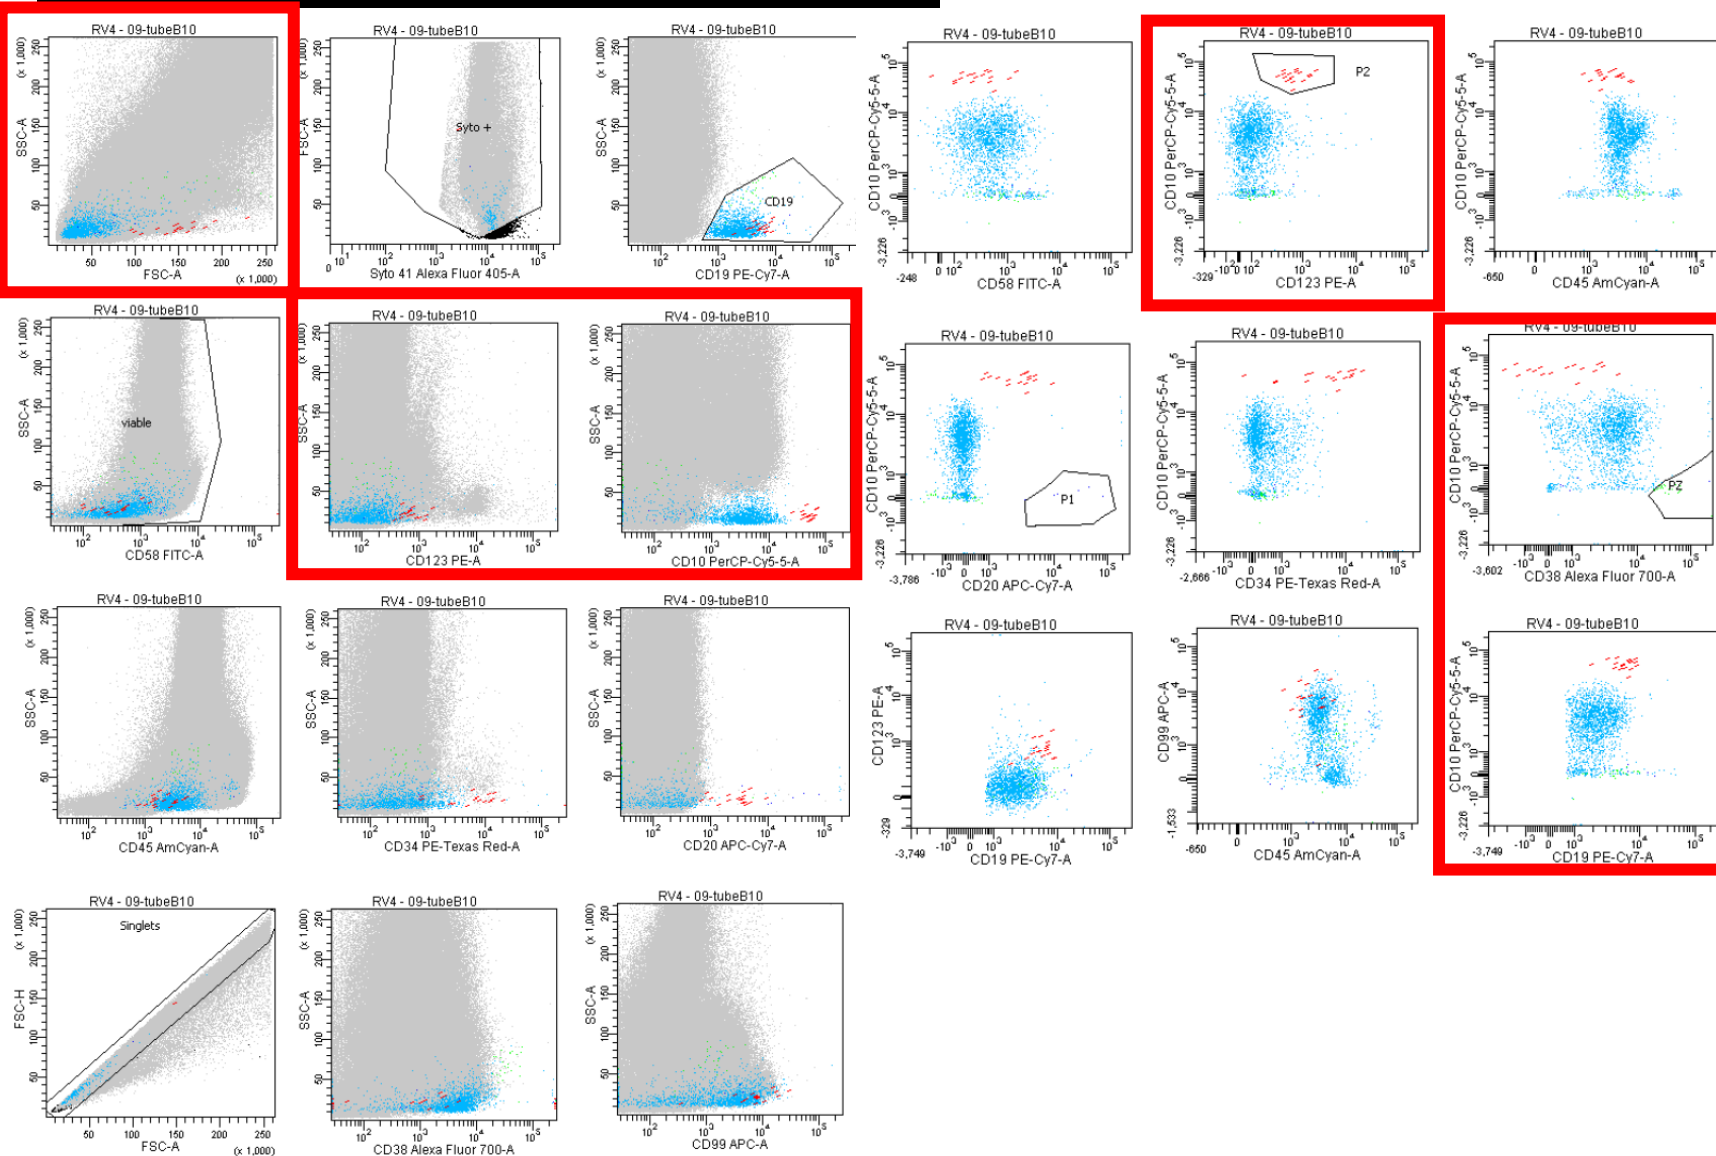

**Problem:**

*Very tiny population*

*Coexistence of **blasts** & BCP 1&2*

*Dim/neg CD34 on BCP1*

**Solutions: MANY**

*mind FSC (higher than BCP 1&2)*

*CD10 overexpression*

*CD19 higher than BCP 1&2*

*CD38 (!! too low)*

*CD123 positive*

*Reverse population (BCP 1&2):  
no aberration (apart from CD34)*

# BCP - REGENERATION LMD MRD trial 2018 (RT7)

## Analysis of problematic cases

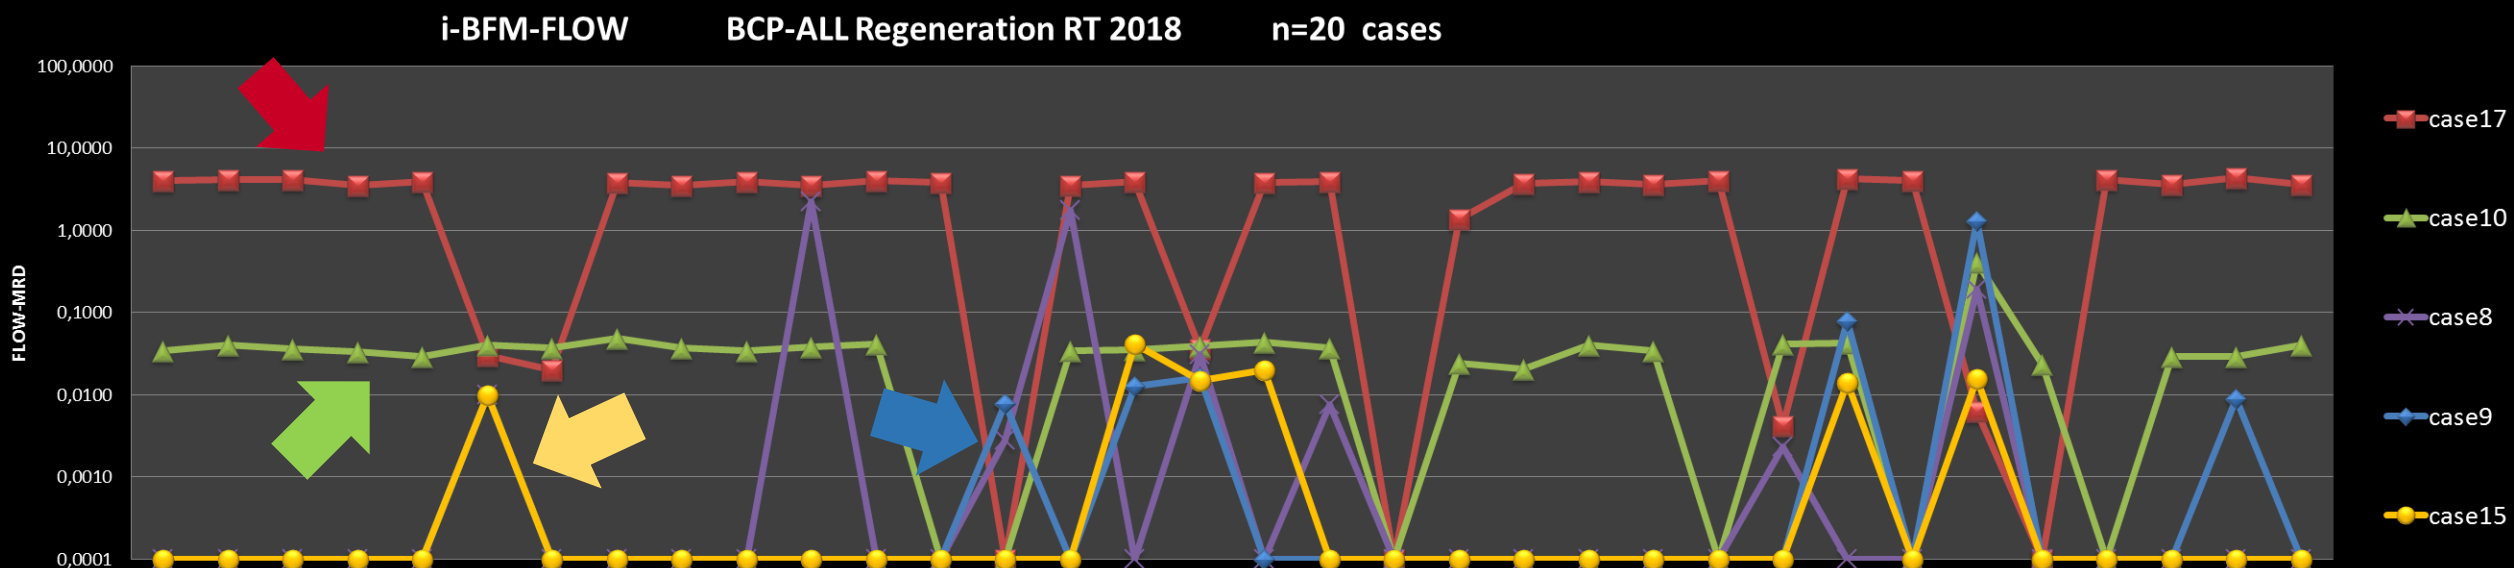



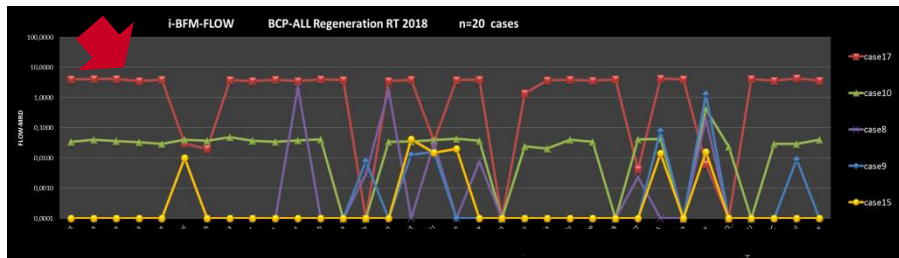

# Case 17

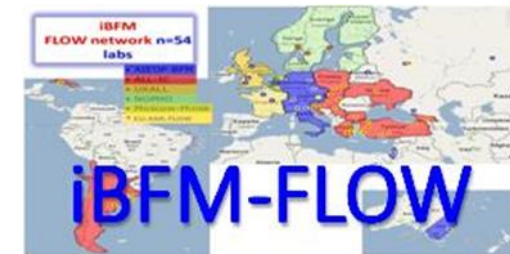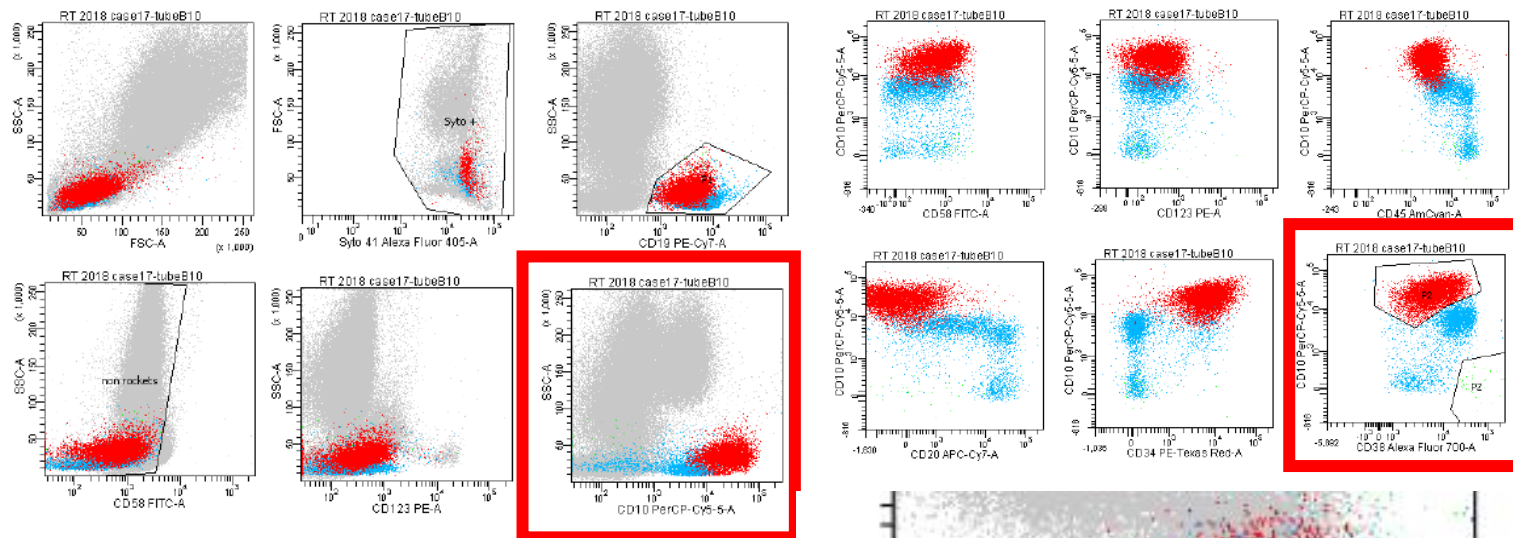

**Problem:**

*Probable EARLY BCP-regeneration*

*Insufficient separation by classical markers like CD10*

**Solution:**

*Mind elevated SSC – should be very low in normal BCP1*

*Mind unusually heterogeneous CD38*

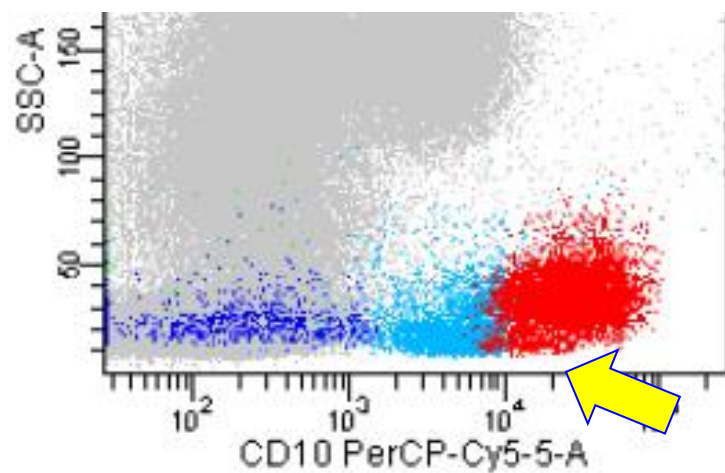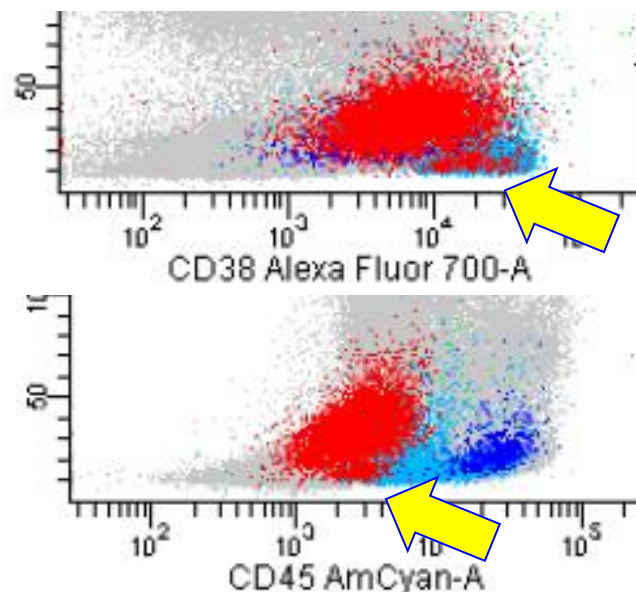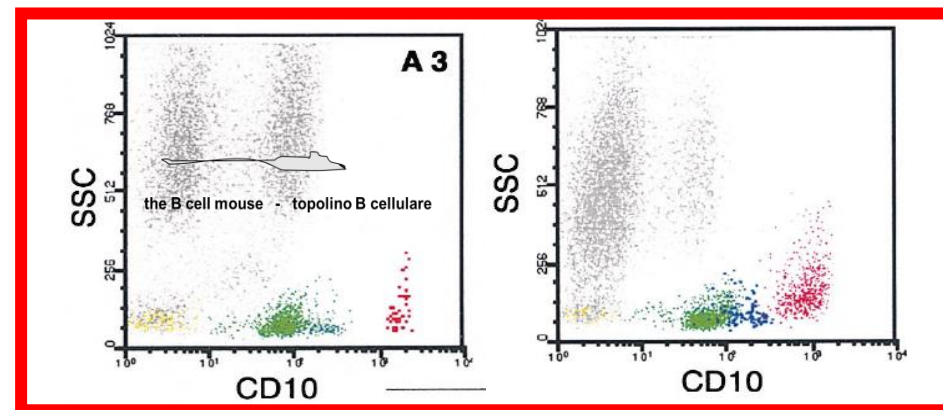

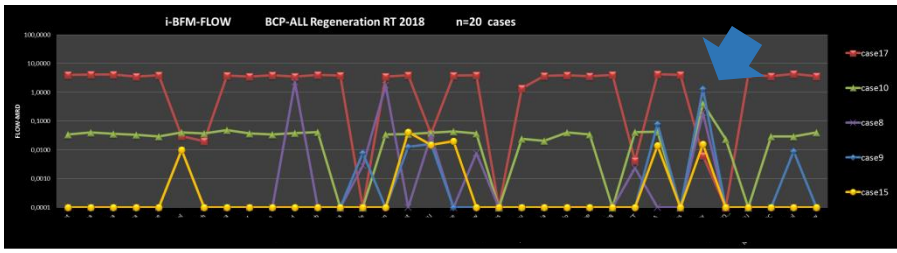

# Case 9

Target vote: **negative**

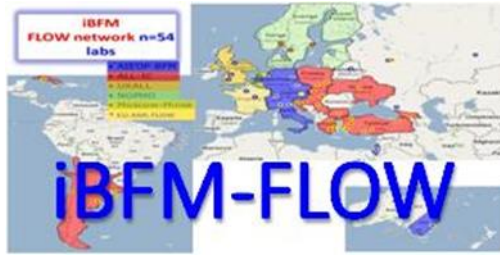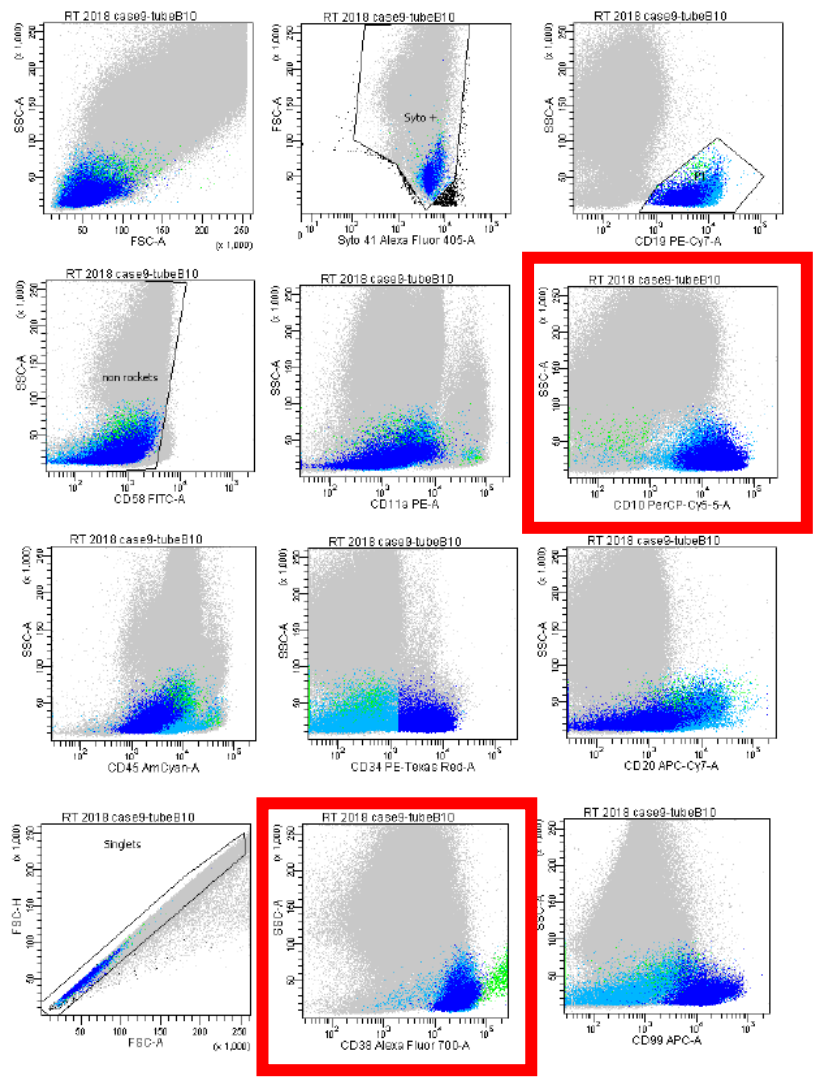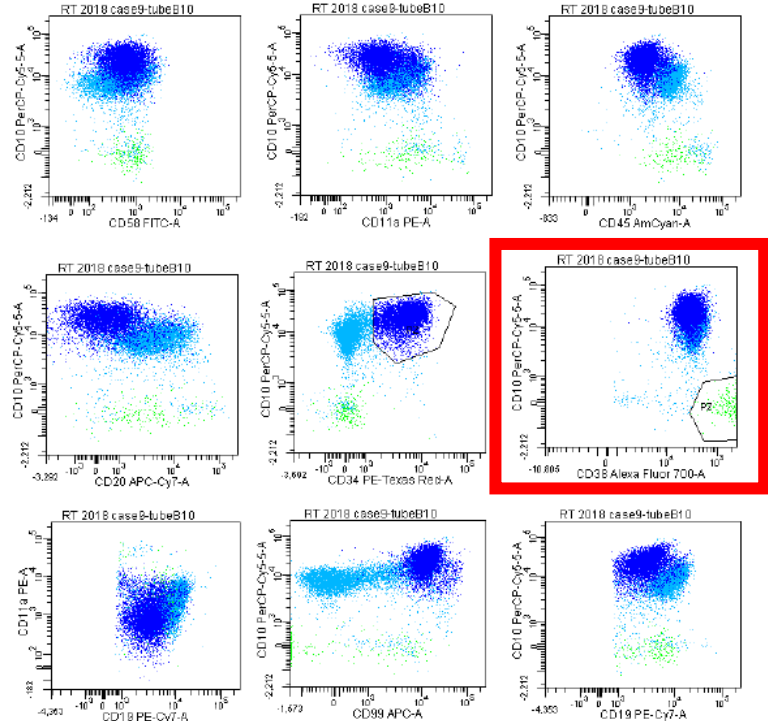

Tube: tubeB10

| Population    | #Events   | %Parent | %Total |
|---------------|-----------|---------|--------|
| All Events    | 1,145,721 | ###     | 100.0  |
| Syto +        | 1,135,088 | 99.1    | 99.1   |
| Singlets      | 990,586   | 87.2    | 86.4   |
| Erythroblasts | 27,435    | 2.3     | 2.4    |
| non rockets   | 982,787   | 99.2    | 85.7   |
| P1            | 48,618    | 4.3     | 4.2    |
| P2            | 22,635    | 46.5    | 2.0    |

  

Tube Name: tubeB10  
Record Date: Jan 17, 2018 3:20:22 PM

| Population    | #Events   | %Parent | %Grand Pare | %Total  |
|---------------|-----------|---------|-------------|---------|
| Syto +        | 1,135,088 | 99.0727 | ###         | 99.0727 |
| Singlets      | 990,586   | 87.1927 | 86.3842     | 86.3842 |
| Erythroblasts | 27,435    | 2.7596  | 2.4149      | 2.3925  |
| non rockets   | 982,787   | 99.2127 | 86.5062     | 85.7041 |
| P1            | 48,618    | 4.9470  | 4.9080      | 4.2397  |
| P2            | 22,635    | 1.5817  | 0.0782      | 0.0671  |
| P2            | 22,635    | 46.5568 | 2.3031      | 1.9739  |

**Problem:**

*Strong early BCP 1 & 2-regeneration*  
*Almost no mature BCP3 for comparison*

**Solution:**

*mind very compact patterns*  
*e.g. in CD38, CD45*

*No aberration in any marker*

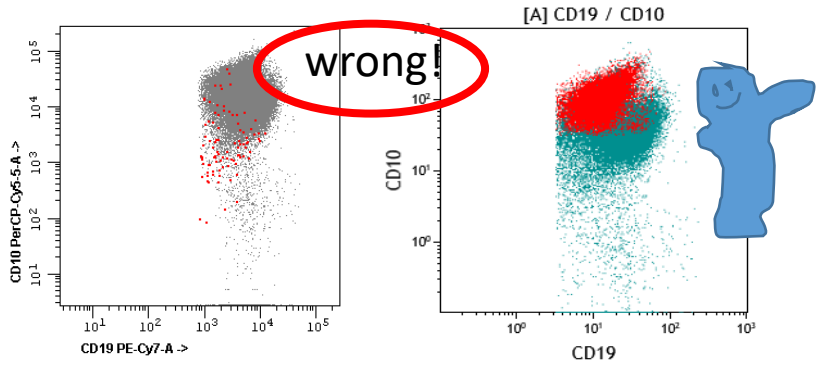



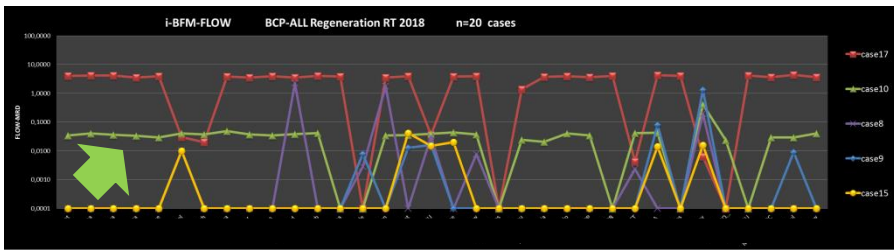

## Case 10

Target vote: **positive ~0.035%**

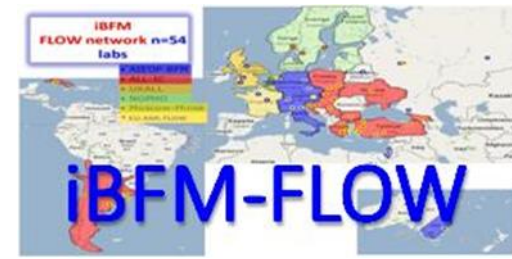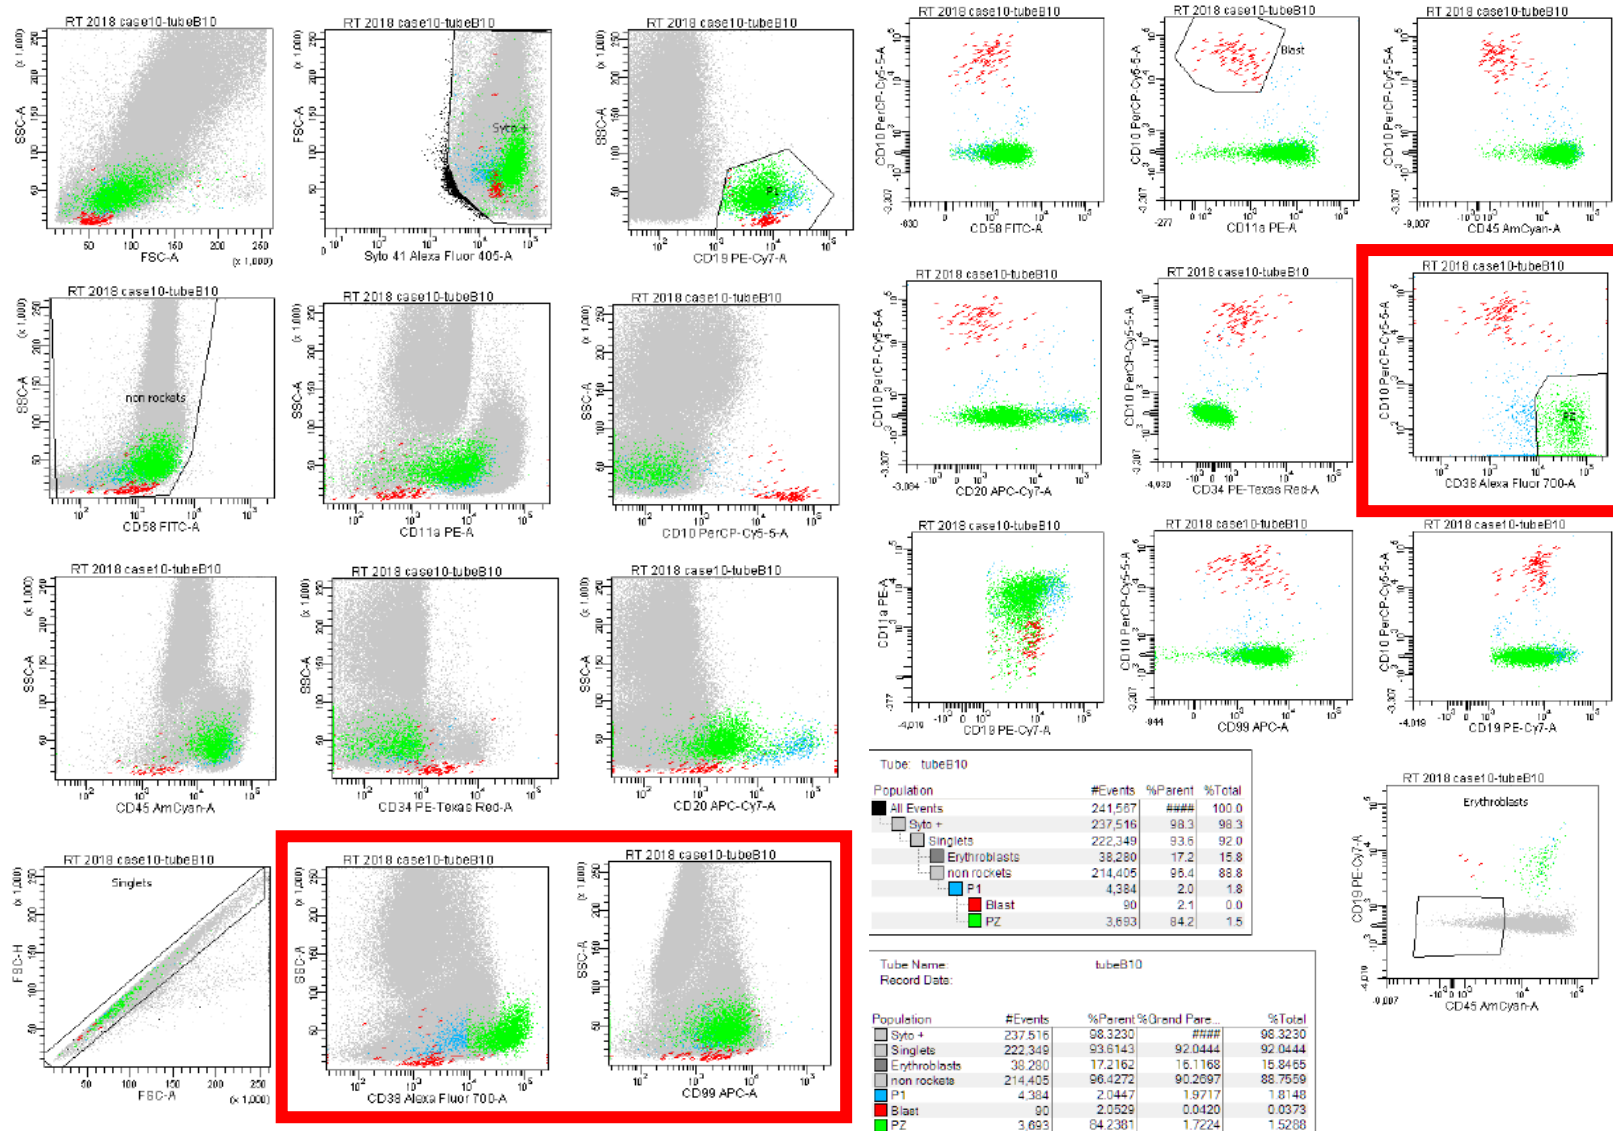

**Problem:**

*Probable early BCP-regeneration, but very few maturing B-cells for comparison (mostly plasma cells)*

*Insufficient separation by classical markers like CD10*

*Very small cells with very low SSC – reminiscent of normal BCP1*

**Solution:**

*mind CD99 and CD38 (!! too low)*



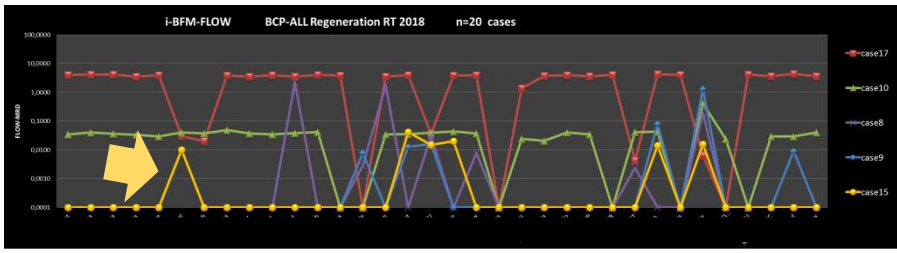

# Case 15

Target vote: **negative**

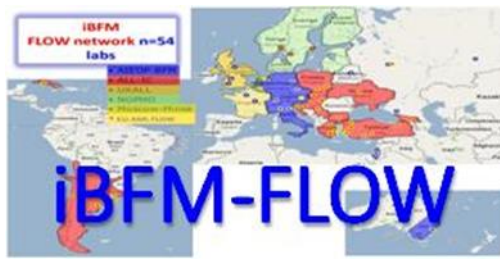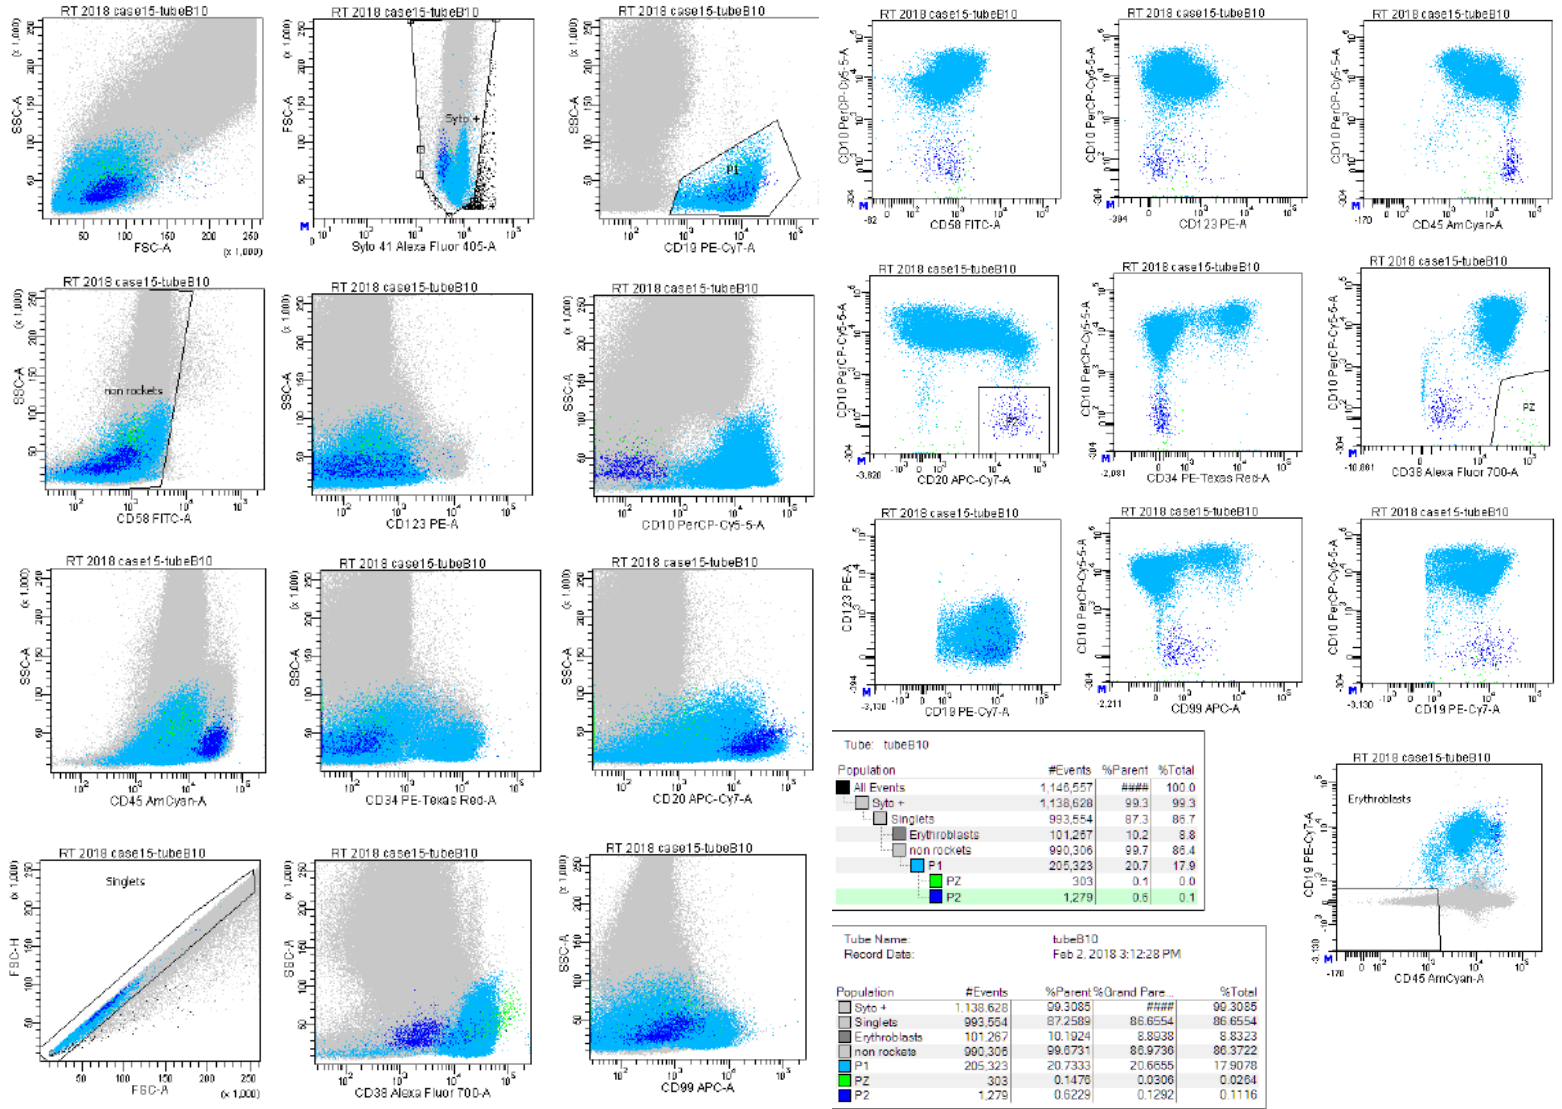

**Problem:**

*Strong early BCP 1 & 2-regeneration*

**Solution:**

*mind very compact patterns  
e.g. in CD38, CD45*

*No aberration in any marker*
