# Supplementary material for: An Extensive Quality Control and Quality Assurance (QC/QA) Program Significantly Improves Inter-Laboratory Concordance Rates of Flow-Cytometric Minimal Residual Disease Assessment in Acute Lymphoblastic Leukemia: An I-BFM-FLOW-Network Report
Source: MDPI journal article supplement (doi:10.3390/cancers13236148), 2021-12-06
Supplement: s1 [file s1]

## iBFM FLOW *twinning* program

|                               |  |
|-------------------------------|--|
| <b>ALL IC-BFM center:</b>     |  |
| <b>AIEOP-BFM partner:</b>     |  |
| <b>Start of co-operation:</b> |  |
| <b>Training periods:</b>      |  |

### Track records ALL-MRD day 15

## Guidelines

- "Maturation" to release MRD day15 results for clinical application without further control by the partner lab is granted to a center according to defined criteria.
- "Maturation" to release MRD day15 results for clinical application is separate by lineage.
- "Maturation" shall be granted upon completion of a series of 25 different patient sample pairs (dx and day15 MRD) per lineage jointly assessed and provided that NO GROSS failures to identify and quantify day 15 MRD at first-sight were recorded in the most recent half (i.e. 12 patients) of the series.
- Gross failures are defined as "recurrent (>2x) inadequacy of staining and analysis", "blast population missed", "gross *miss*-gating".
- Gross *miss*-gating is e.g. defined by ">= 5-fold discrepancy between trainee's and supervisor's MRD result".
- Simple differences at prognostic thresholds (e.g. 0.09% vs. 0.11%) are NOT regarded gross failures although leading to different stratification.
- Each gross failure necessitates further 3 day15 assessments (same lineage) without failure in order to grant "maturation".
- In case of uncertainty, partner labs will be open for consultation also after granting "maturation".
- Traceability (i.e n of cases, dates of analysis, n of failures...etc) of "maturation" has to be reported in an official track record form provided by the iBFM coordinator. The track record form is kept and completed at the AIEOP-BFM site based in parts on information provided by the ALL-IC center.
- "Maturation" accreditation must be communicated to and approved by the iBFM co-ordinator upon consensual suggestion by the twinning partners. Once consensus was found regarding "maturation", twinning partners should send the completed track record form to the iBFM FLOW co-ordinator. This can be accomplished at different time-points per lineage.
- The iBFM FLOW co-ordinator informs the ALL IC-BFM FLOW co-ordinator of granting "maturation" to an ALL IC-BFM FLOW center.

## **iBFM FLOW *twinning* program**

|                               |  |
|-------------------------------|--|
| <b>ALL IC-BFM center:</b>     |  |
| <b>AIEOP-BFM partner:</b>     |  |
| <b>Start of co-operation:</b> |  |
| <b>Training periods:</b>      |  |

### **Track record ALL-MRD day 15**

#### **B-lineage**

(<sup>1</sup>=ALL-IC center, <sup>2</sup>=AIEOP-BFM partner)

|           | <b>patient<br/>code<sup>1</sup></b> | <b>sampling<br/>date<sup>1</sup></b> | <b>date of<br/>review<sup>2</sup></b> | <b>failure<sup>2</sup><br/>Y/N</b> | <b>comment (failure type)</b> |
|-----------|-------------------------------------|--------------------------------------|---------------------------------------|------------------------------------|-------------------------------|
| <b>1</b>  | SASOMO                              | 12Nov2010                            | 16Nov2010                             | N                                  | /                             |
| <b>2</b>  |                                     |                                      |                                       |                                    |                               |
| <b>3</b>  |                                     |                                      |                                       |                                    |                               |
| <b>4</b>  |                                     |                                      |                                       |                                    |                               |
| <b>5</b>  |                                     |                                      |                                       |                                    |                               |
| <b>6</b>  |                                     |                                      |                                       |                                    |                               |
| <b>7</b>  |                                     |                                      |                                       |                                    |                               |
| <b>8</b>  |                                     |                                      |                                       |                                    |                               |
| <b>9</b>  |                                     |                                      |                                       |                                    |                               |
| <b>10</b> |                                     |                                      |                                       |                                    |                               |
| <b>11</b> |                                     |                                      |                                       |                                    |                               |
| <b>12</b> |                                     |                                      |                                       |                                    |                               |
| <b>13</b> |                                     |                                      |                                       |                                    |                               |
| <b>14</b> |                                     |                                      |                                       |                                    |                               |
| <b>15</b> |                                     |                                      |                                       |                                    |                               |
| <b>16</b> |                                     |                                      |                                       |                                    |                               |
| <b>17</b> |                                     |                                      |                                       |                                    |                               |
| <b>18</b> |                                     |                                      |                                       |                                    |                               |
| <b>19</b> |                                     |                                      |                                       |                                    |                               |
| <b>20</b> |                                     |                                      |                                       |                                    |                               |
| <b>21</b> |                                     |                                      |                                       |                                    |                               |
| <b>22</b> |                                     |                                      |                                       |                                    |                               |
| <b>23</b> |                                     |                                      |                                       |                                    |                               |
| <b>24</b> |                                     |                                      |                                       |                                    |                               |
| <b>25</b> |                                     |                                      |                                       |                                    |                               |
| <b>26</b> |                                     |                                      |                                       |                                    |                               |
| <b>27</b> |                                     |                                      |                                       |                                    |                               |
| <b>28</b> |                                     |                                      |                                       |                                    |                               |

**failure types: 1) >2 samples with poor quality staining, 2) blast population missed,  
3) gross miss-gating (e.g. ≥5-fold discrepant MRD value from reviewer)**

## iBFM FLOW *twinning* program

|                               |  |
|-------------------------------|--|
| <b>ALL IC-BFM center:</b>     |  |
| <b>AIEOP-BFM partner:</b>     |  |
| <b>Start of co-operation:</b> |  |
| <b>Training periods:</b>      |  |

## Track record ALL-MRD day 15

## B-lineage, continued

(<sup>1</sup>=ALL-IC center, <sup>2</sup>=AIEOP-BFM partner)

[illegible]

**failure types: 1) > 2 samples with poor quality staining, 2) blast population missed, 3) gross miss-gating (e.g.  $\geq 5$ -fold discrepant MRD value from reviewer)**

## **iBFM FLOW *twinning* program**

|                               |  |
|-------------------------------|--|
| <b>ALL IC-BFM center:</b>     |  |
| <b>AIEOP-BFM partner:</b>     |  |
| <b>Start of co-operation:</b> |  |
| <b>Training periods:</b>      |  |

### **Track record ALL-MRD day 15**

#### **T-lineage**

(<sup>1</sup>=ALL-IC center, <sup>2</sup>=AIEOP-BFM partner)

|           | <b>patient<br/>code<sup>1</sup></b> | <b>sampling<br/>date<sup>1</sup></b> | <b>date of<br/>review<sup>2</sup></b> | <b>failure<sup>2</sup><br/>Y/N</b> | <b>comment (failure type)</b> |
|-----------|-------------------------------------|--------------------------------------|---------------------------------------|------------------------------------|-------------------------------|
| <b>1</b>  |                                     |                                      |                                       |                                    |                               |
| <b>2</b>  |                                     |                                      |                                       |                                    |                               |
| <b>3</b>  |                                     |                                      |                                       |                                    |                               |
| <b>4</b>  |                                     |                                      |                                       |                                    |                               |
| <b>5</b>  |                                     |                                      |                                       |                                    |                               |
| <b>6</b>  |                                     |                                      |                                       |                                    |                               |
| <b>7</b>  |                                     |                                      |                                       |                                    |                               |
| <b>8</b>  |                                     |                                      |                                       |                                    |                               |
| <b>9</b>  |                                     |                                      |                                       |                                    |                               |
| <b>10</b> |                                     |                                      |                                       |                                    |                               |
| <b>11</b> |                                     |                                      |                                       |                                    |                               |
| <b>12</b> |                                     |                                      |                                       |                                    |                               |
| <b>13</b> |                                     |                                      |                                       |                                    |                               |
| <b>14</b> |                                     |                                      |                                       |                                    |                               |
| <b>15</b> |                                     |                                      |                                       |                                    |                               |
| <b>16</b> |                                     |                                      |                                       |                                    |                               |
| <b>17</b> |                                     |                                      |                                       |                                    |                               |
| <b>18</b> |                                     |                                      |                                       |                                    |                               |
| <b>19</b> |                                     |                                      |                                       |                                    |                               |
| <b>20</b> |                                     |                                      |                                       |                                    |                               |
| <b>21</b> |                                     |                                      |                                       |                                    |                               |
| <b>22</b> |                                     |                                      |                                       |                                    |                               |
| <b>23</b> |                                     |                                      |                                       |                                    |                               |
| <b>24</b> |                                     |                                      |                                       |                                    |                               |
| <b>25</b> |                                     |                                      |                                       |                                    |                               |
| <b>26</b> |                                     |                                      |                                       |                                    |                               |
| <b>27</b> |                                     |                                      |                                       |                                    |                               |
| <b>28</b> |                                     |                                      |                                       |                                    |                               |

**failure types: 1) >2 samples with poor quality staining, 2) blast population missed,  
3) gross miss-gating (e.g. ≥5-fold discrepant MRD value from reviewer)**

## iBFM FLOW *twinning* program

|                               |  |
|-------------------------------|--|
| <b>ALL IC-BFM center:</b>     |  |
| <b>AIEOP-BFM partner:</b>     |  |
| <b>Start of co-operation:</b> |  |
| <b>Training periods:</b>      |  |

## Track record ALL-MRD day 15

## T-lineage, continued

(<sup>1</sup>=ALL-IC center, <sup>2</sup>=AIEOP-BFM partner)

[illegible]

**failure types: 1) >2 samples with poor quality staining, 2) blast population missed, 3) gross miss-gating (e.g.  $\geq 5$ -fold discrepant MRD value from reviewer)**

## **iBFM FLOW *twinning* program**

|                                                     |                            |
|-----------------------------------------------------|----------------------------|
| <b>ALL IC-BFM center:</b>                           |                            |
| <b>AIEOP-BFM partner:</b>                           |                            |
| <b>Start of co-operation:</b>                       |                            |
| <b>Training periods:</b>                            |                            |
| <b>Maturation criteria fulfilled for B-Lin. ALL</b> | <b>YES/NO*      Date:*</b> |
| <b>Maturation criteria fulfilled for T-Lin. ALL</b> | <b>YES/NO*      Date:*</b> |

\* to be filled by AIEOP-BFM partner

**“Maturation” granted for B-lineage ALL**

AIEOP-BFM supervisor\*: \_\_\_\_\_ date: \_\_\_\_\_

iBFM FLOW network coordinator: \_\_\_\_\_ date: \_\_\_\_\_

**“Maturation” granted for T-lineage ALL**

AIEOP-BFM supervisor\*: \_\_\_\_\_ date: \_\_\_\_\_

iBFM FLOW network coordinator: \_\_\_\_\_ date: \_\_\_\_\_

\*to be signed by representative of the AIEOP-BFM partner center
