# Supplementary material for: An Extensive Quality Control and Quality Assurance (QC/QA) Program Significantly Improves Inter-Laboratory Concordance Rates of Flow-Cytometric Minimal Residual Disease Assessment in Acute Lymphoblastic Leukemia: An I-BFM-FLOW-Network Report
Source: Cancers (Basel). 2021 Dec 6;13(23):6148. doi: 10.3390/cancers13236148 (PMC8656726; doi:10.3390/cancers13236148)
Supplement: Supplementary file 1 [file cancers-13-06148-s001.zip]

Archive with 13 entries (13 files):
- Figure S2.pdf
- FigureS1.pdf
- Supplemental File 1 SOP AIEOP-BFM.pdf
- Supplemental File 2 SOP ALL-IC 2009.pdf
- Supplemental File 3 Amendment to SOP ALL-IC_2014.pdf
- Supplemental File 4 iBFM FLOW Twinning Maturation.pdf
- Supplemental File 5 Maturation Certificate.pdf
- Supplemental File 6 Data query.xls
- Supplemental File 7 Educational Slides.pdf
- Table S1.xlsx
- Table S2.xlsx
- Table S3.xlsx
- Table S4.xlsx
