# Supplementary material for: An Extensive Quality Control and Quality Assurance (QC/QA) Program Significantly Improves Inter-Laboratory Concordance Rates of Flow-Cytometric Minimal Residual Disease Assessment in Acute Lymphoblastic Leukemia: An I-BFM-FLOW-Network Report
Source: Cancers (Basel). 2021 Dec 6;13(23):6148. doi: 10.3390/cancers13236148 (PMC8656726; doi:10.3390/cancers13236148)
Supplement: Supplementary file 1 [file cancers-13-06148-s001.zip › Supplemental File 6 Data query.xls]

## Sheet: Center X
Center	Center	Center	Center	Center	data frozen per
day 15 data	period pB-ALL	total pB-ALL	period T-ALL	total T-ALL
recruited						please fill the painted fields, including specification of period and center name
analyzed						emphasis lies on performance in period, not on the fact to be on-study of the clinical protocol
not done						left column = recruited last year
controlled by partner						right column = all samples since start of twinning period and continued thereafter until end of last year
total FLR					includes all FLR samples with blasts <0.1%, i.e. really negative and low positives
FMR
FHR
FLR which are really negative					includes only samples which are really negative - these are a subgroup of FLR (blasts <0.1%)
NO risk vote possible					samples with erythroblasts below 2% AND blasts below 10% (i.e. FHR excluded!), so called "poor quality"
FLR %	#DIV/0!	#DIV/0!	#DIV/0!	#DIV/0!
FMR %	#DIV/0!	#DIV/0!	#DIV/0!	#DIV/0!
FHR %	#DIV/0!	#DIV/0!	#DIV/0!	#DIV/0!
negatives %	#DIV/0!	#DIV/0!	#DIV/0!	#DIV/0!
poor quality %	#DIV/0!	#DIV/0!	#DIV/0!	#DIV/0!
n= analyzed day33
n= blast ≥0.1% day33
% blast ≥0.1% day33	#DIV/0!	#DIV/0!	#DIV/0!	#DIV/0!
control	0	0	0	0
start of MRD testing per ALL IC collaboration						2012-12-12
start of twinning						13.13.2013
maturation B						no
maturation T						no
date of national official start of ALL IC 2009 protocol						N/A
