# Supplementary material for: An Extensive Quality Control and Quality Assurance (QC/QA) Program Significantly Improves Inter-Laboratory Concordance Rates of Flow-Cytometric Minimal Residual Disease Assessment in Acute Lymphoblastic Leukemia: An I-BFM-FLOW-Network Report
Source: Cancers (Basel). 2021 Dec 6;13(23):6148. doi: 10.3390/cancers13236148 (PMC8656726; doi:10.3390/cancers13236148)
Supplement: Supplementary file 1 [file cancers-13-06148-s001.zip › Table S1.xlsx]

## Sheet: B and T Panels
Tube	Antibody	Fluorochrome	Clone	Manufacturer
Tube 1	CD58	FITC	AICD58	Beckman Coulter
	patient specific drop-in*	PE
	CD45	PerCP	2D1	Becton Dickinson
	CD10	PE-CF594	HI10A	Becton Dickinson
	CD34	PE-Cy7	8G12	Becton Dickinson
	CD19	APC	SJ25C1	Becton Dickinson
	CD20	APC-Cy7	L27	Becton Dickinson
	CD38	Alexa 700	HIT2	EXBIO
	Syto41
Tube 2	CD20	FITC	L27	Becton Dickinson
	CD99	PE	3B2	Becton Dickinson
	CD45	PerCP	2D1	Becton Dickinson
	CD10	PE-CF594	HI10A	Becton Dickinson
	CD34	PE-Cy7	8G12	Becton Dickinson
	CD19	APC	SJ25C1	Becton Dickinson
	CD38	Alexa 700	HIT2	EXBIO
	Syto41
ReAlb DuraCloneTm	CD58	FITC	AICD58	Beckman Coulter
	patient specific drop-in*	PE
	CD34	ECD	581	Beckman Coulter
	CD10	PC5.5	ALB1	Beckman Coulter
	CD19	PC7	J3-119	Beckman Coulter
	patient specific drop-in*	APC
	CD38	APC-A700	LS198-4-3	Beckman Coulter
	CD20	APC-A750	B9.E9 (HRC20)	Beckman Coulter
	CD45	KrO	J.33	Beckman Coulter
	Syto41
*Patient Specific Drop-in
	CD11a	PE	HI111	Becton Dickinson
	CD123	PE	9F5	Becton Dickinson
	CD371	PE	50C1	BioLegend
	NG2	PE	7.1.	Beckman Coulter
	CRLF2	PE	1D3	BioLegend
	CD99	APC	3B2/TA8	EXBIO
T-ALL Panel	CD99	FITC	3B2/TA8	EXBIO
	CD48	PE	BJ40	BioLegend
	CD34	ECD	581	Beckman Coulter
	CD3	PerCP-Cy5.5	UCHT1	EXBIO
	CD5	PE-Cy7	L17F12	EXBIO
	CD7	APC	124-1D1	EXBIO
	CD4	APC-A700	13B8.2	Beckman Coulter
	CD8	APC-Cy7	MEM-31	EXBIO
	Syto41
	CD45	Pacific Orange	2D1	EXBIO
	CD16+CD56	BV605	3G8/HCD56	BioLegend
	CD33	BV650	WM53	BioLegend
	CD24	BV785	ML5	BioLegend

## Sheet: Sheet1
Tube	Antibody	Fluorochrome	Clone	Manufacturer
Tube 1	CD58	FITC	AICD58	Beckman Coulter
	patient specific drop-in*	PE
	CD45	PerCP	2D1	Becton Dickinson
	CD10	PE-CF594	HI10A	Becton Dickinson
	CD34	PE-Cy7	8G12	Becton Dickinson
	CD19	APC	SJ25C1	Becton Dickinson
	CD20	APC-Cy7	L27	Becton Dickinson
	CD38	Alexa 700	HIT2	EXBIO
	Syto41
Tube 2	CD20	FITC	L27	Becton Dickinson
	CD99	PE	3B2	Becton Dickinson
	CD45	PerCP	2D1	Becton Dickinson
	CD10	PE-CF594	HI10A	Becton Dickinson
	CD34	PE-Cy7	8G12	Becton Dickinson
	CD19	APC	SJ25C1	Becton Dickinson
	CD38	Alexa 700	HIT2	EXBIO
	Syto41
ReAlb DuraCloneTm	CD58	FITC	AICD58	Beckman Coulter
	patient specific drop-in*	PE
	CD34	ECD	581	Beckman Coulter
	CD10	PC5.5	ALB1	Beckman Coulter
	CD19	PC7	J3-119	Beckman Coulter
	patient specific drop-in*	APC
	CD38	APC-A700	LS198-4-3	Beckman Coulter
	CD20	APC-A750	B9.E9 (HRC20)	Beckman Coulter
	CD45	KrO	J.33	Beckman Coulter
	Syto41
*Patient Specific Drop-in
	CD11a	PE	MEM25	EXBIO
	CD123	PE	9F5	Becton Dickinson
	CD371	PE	50C1	BioLegend
	NG2	PE	7.1.	Beckman Coulter
	CRLF2	PE	1D3	BioLegend
	CD99	APC	3B2/TA8	EXBIO
