# Supplementary material for: An Extensive Quality Control and Quality Assurance (QC/QA) Program Significantly Improves Inter-Laboratory Concordance Rates of Flow-Cytometric Minimal Residual Disease Assessment in Acute Lymphoblastic Leukemia: An I-BFM-FLOW-Network Report
Source: Cancers (Basel). 2021 Dec 6;13(23):6148. doi: 10.3390/cancers13236148 (PMC8656726; doi:10.3390/cancers13236148)
Supplement: Supplementary file 1 [file cancers-13-06148-s001.zip › Table S2.xlsx]

## Sheet: Table S2
16 best trainee laboratories*
	Main sample set (sample 1-25)		Series 1 (sample 1-13)	Series 2 (sample 14-25)	Series 3 (sample 14-31)
Total Nº of reported results	400		208	192	221
Nº of failures	29		23	6	6
Failures [%]	7.3		11.1	3.1	2.7
	All samples (sample 1-31)		p<0.01
Total Nº of reported results	429
Nº of failures	29		p<0.01
Failures [%]	6.8
*16 laboratories finished maturation within a maximum of 31 samples (=mean number of samples needed for achieving maturation)
