# Supplementary material for: An Extensive Quality Control and Quality Assurance (QC/QA) Program Significantly Improves Inter-Laboratory Concordance Rates of Flow-Cytometric Minimal Residual Disease Assessment in Acute Lymphoblastic Leukemia: An I-BFM-FLOW-Network Report
Source: Cancers (Basel). 2021 Dec 6;13(23):6148. doi: 10.3390/cancers13236148 (PMC8656726; doi:10.3390/cancers13236148)
Supplement: Supplementary file 1 [file cancers-13-06148-s001.zip › Table S3.xlsx]

## Sheet: Sheet1
RT	Case	false positive	false negative	inaccurate gating~	picking of wrong population (ev unvollständig)	Problem I	Problem II	Problem III	Problem IV	Solution
2016	11		x	x (leading to lower or higher)		unusual phenotype	heterogeneous blast population			BI and BII heterogeneous blast population
2016	18		x	x (leading to lower)		very few MRD cells				mind CD38 and CD45 (CD38 neg)
2016	17	x				strong BCP regeneration				negativ, viele gaben positive
2016	12	x				strong early BCP-regeneration				negativ, viele gaben positive
2016	2	x				strong early BCP-regeneration				negativ, viele gaben positive
2017	10		x	x (leading to lower)		strong early BCP-regeneration	unusual and heterogeneous phenotype			mind CD38, CD45 dim/negativity and typical CD19 overexpression
2017	18		x	x (leading to lower)		strong early BCP-regeneration	insufficient separation by classical markers like CD10			mind CD11a negativity
2017	1	x				early and intermediate BCP regeneration				negative, viele gaben positive; normal CD19 ghost plot
2017	3	x				strong and solely early BCP1 regeneration	no mature BCP3 for comparison			negative, viele gaben positive, mind compact pattern in CD38, CD45; no aberration in any marker
2017	19	x				diffuse CD10 and increased CD20 expression on early BCP (stage 1)				difficult; mind very compact & correct patterns in CD38/Cd45; mind elevated SSC, mind very compact & correct patterns in CD38/Cd45; CD19 rather correct (somewhat lower than in early maturing BCP3); CD11a, CD58 inconspicuous ,
2018	17		x	x (leading to lower)		probable early BCP regeneration	insufficient separation by classical markers like CD10			insufficient separation by classical markers like CD10; mind elevated SSC; should be very low in normal BCP1; mind unusually heterogenous CD38
2018	10		x	x (leading to higher)		probable early BCP regeneration	but very few maturing B cells for comparison (mostly plasma cells)	insufficient separation by classical markers like CD10	very small cells with very low SSC, reminiscent of normal BCP1	mind CD99 and CD38 (too low), positive
2018	8	x				strong early BCP 1 (&2) regeneration	atypical CD38 in plasma cells;			negative, no aberration in any marker
2018	9	x				strong early BCP 1&2 regeneration	almost no mature BCP3 for comparison			negative, no aberration in any marker; mind very compact pattern eg CD38/CD45
2018	15	x				strong early BCP 1&2 regeneration				negative, mind very compact patterns in CD38 and CD45, no aberration in any marker
2019	11		x			probable early BCP regeneration	insufficient separation by classical markers like CD10			mind elevated SSC, should be very low in normal BCP1, mind unusual heterogenous CD38
2019	4		x	x (leading to higher or lower)	x	insufficient separation by classical markers like CD10	co existence of blasts and BCP1			mind CD45 (higher than BCP1), CD38 (too low), CD11a negative
2019	3		x	x		insufficient separation by classical markers like CD10	co existence of blasts and BCP1			mind CD45 (higher than BCP1), CD38 (too low), CD11a negative
2019	9		x (target 0,002; manche 0,001)	x		very tiny population	co existence of blasts and BCP1	dim/ neg CD34 on BCP1		mind FSC higher, CD10 overexpression, CD19 higher, CD38 too low, CD123 positive
2019	1	x				strong early BCP1&2- regeneration	almost no mature BCP3 for comparison	dim/ neg CD34 on BCP1		mind very compact pattern in CD38, CD45, FSC, no aberration in any marker (except CD34)
2019	10	x				strong early BCP1&2- regeneration	almost no mature BCP3 for comparison	dim/ neg CD34 on BCP1		mind very compact pattern in CD38, CD45, FSC, no aberration in any marker (except CD34)
2020	4	x				strong early BCP1&2- regeneration	almost no mature BCP3 for comparison	CD34 dim /neg		CD10 overexpression, SSC elevated, CD19 higher, CD38 & CD45 too low, CD58 overexpression
2020	14			x (leading to higher)		heavy regeneration	coexistence of blasts & BCP	mature BCP "echo" population		mind very compact patterns eg in CD38 and CD45, no aberrations in any marker
2020	18	x				strong early BCP 1&2 regeneration				mind very comact patterns eg in CD38, CD45, FSC; no aberration in any marker (except CD34)
~leading to lower or higher amount of MRD cells

## Sheet: Sheet2
Problem*	No. Samples°	Type of error
		false positive	false negative	inaccurate gating~
strong regeneration	18	13	5	5
insufficient discrimination by classical expression markers	7		5	5
no mature B-cells for comparison	6	5	1	1
neg or dim CD34 expression on BCP1 in burst regeneration	4	3	1	1
co-existence of blasts and BCP 1	4		3	1
unusual/heterogeneous phenotype of blasts	2	1	1	2
very few MRD cells	2		2	1
other	4	2	1	2
* several problems may apply to each sample
° out of 24 samples in total, which were incorrectly assessed by several centers
~ leading to lower or higher MRD levels
