# Supplementary material for: An Extensive Quality Control and Quality Assurance (QC/QA) Program Significantly Improves Inter-Laboratory Concordance Rates of Flow-Cytometric Minimal Residual Disease Assessment in Acute Lymphoblastic Leukemia: An I-BFM-FLOW-Network Report
Source: Cancers (Basel). 2021 Dec 6;13(23):6148. doi: 10.3390/cancers13236148 (PMC8656726; doi:10.3390/cancers13236148)
Supplement: Supplementary file 1 [file cancers-13-06148-s001.zip › Table S4.xlsx]

## Sheet: Sheet2
Problem*	No. Samples°	Type of error
		false positive	false negative	inaccurate gating~
strong regeneration	18	13	5	5
insufficient discrimination by classical expression markers	7		5	5
no mature B-cells for comparison	6	5	1	1
neg or dim CD34 expression on BCP1 in burst regeneration	4	3	1	1
co-existence of blasts and BCP 1	4		3	1
unusual/heterogeneous phenotype of blasts	2	1	1	2
very few MRD cells	2		2	1
other	4	2	1	2
* several problems may apply to each sample
° out of 24 samples in total, which were incorrectly assessed by several centers
~ leading to lower or higher MRD levels
