# Supplementary figures and images for: An Extensive Quality Control and Quality Assurance (QC/QA) Program Significantly Improves Inter-Laboratory Concordance Rates of Flow-Cytometric Minimal Residual Disease Assessment in Acute Lymphoblastic Leukemia: An I-BFM-FLOW-Network Report
Source: MDPI journal article supplement (doi:10.3390/cancers13236148), 2021-12-06

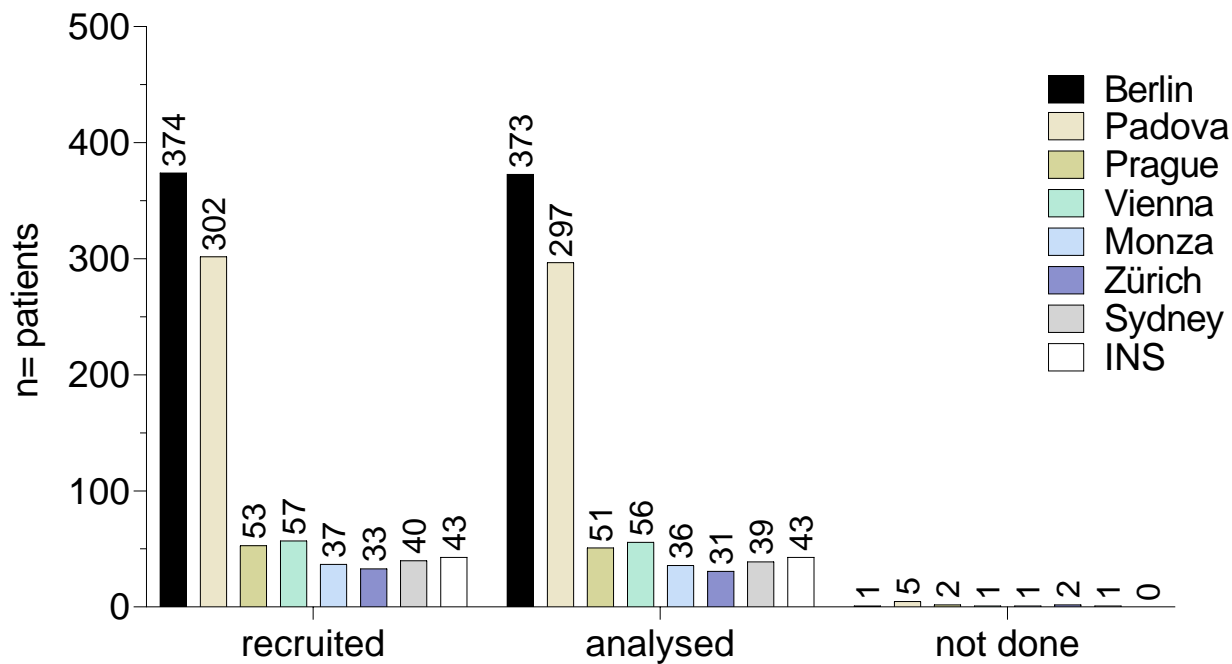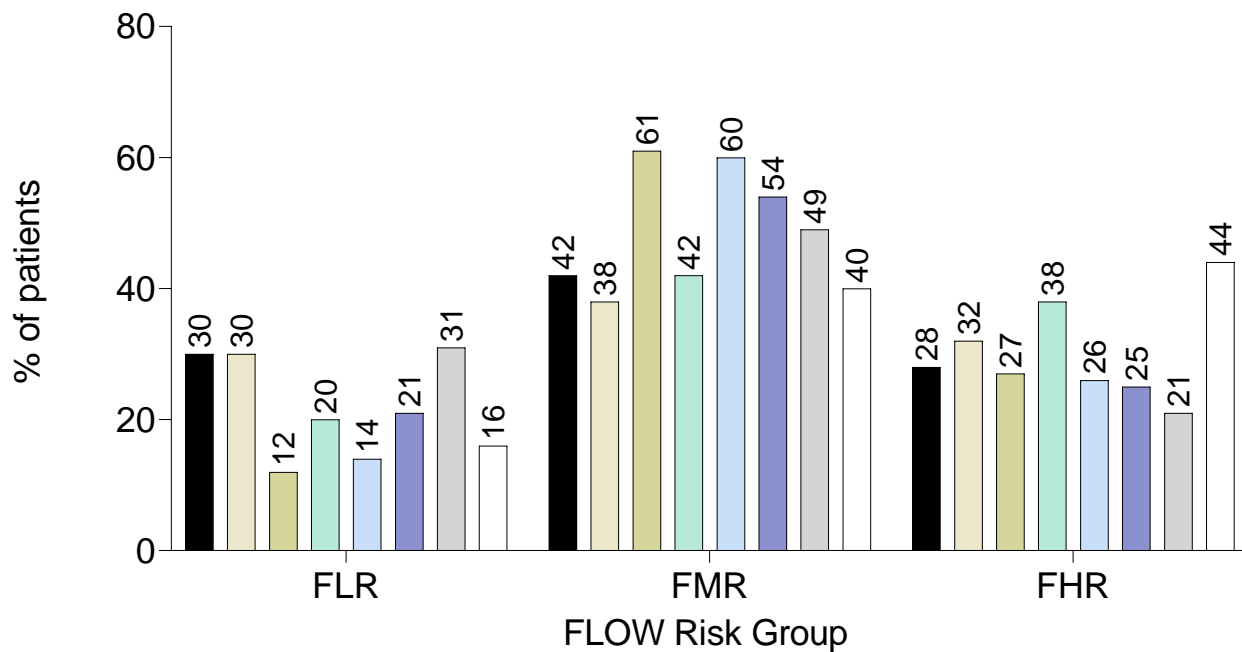

Supplement: s1 [file s1]
